# Supplementary material
Source: MDPI journal article supplement (https://www.mdpi.com/2079-8954/2/2/217)
Supplement: s2 [file s2]

{UTF-8}
********************************************************
	.CoastalProtectSIM v4.1
********************************************************~
		CoastalProtectSimulation v4.1 in support of submission to SYSTEMS journal.  \
		All rights reserved by authors. Contact mdeegan@yahoo.com for more \
		information.
	|

normal scope=
	1
	~	Dmnl
	~		|

Scope Adjustment Cost Multiplier=
	Built Protection Goal*scope adjust+normal scope
	~	Dmnl
	~		|

percent damaged=
	ZIDZ(Current Storm Damage,total land value)
	~	Dmnl
	~	Captures the fraction of property damaged by the storm.
	|

scope adjust=
	0
	~	1/Inches
	~		|

Net Present Value of Current tax revenue=
	(Present Value*annual taxes)
	~	Dollars/Year
	~	The Net Present Value of current tax revenue.
	|

annual taxes=
	if then else(automated taxes=1, desired annual taxes , total land value*effective tax rate\
		 )
	~	Dollars/Year
	~	Annual taxes levied by a community on property owners.
	|

"Natural Environmentall Protecion-Sim1"=
	Initial Natural Environmental Protection*"Impact of Undeveloped Land on Natural Protection-Sim1"
	~	Inches
	~	The protection against storm surge provided by undeveloped land.
	|

"Current Storm Damage per Acre-Sim1"=
	"Effect of Storm Surge on Damage-Sim1"*Maximum Damage Per Acre per storm
	~	Dollars/acres
	~		|

"Perceived Protection-Sim1"=
	SMOOTHI("Total Coastal Protection-Sim1",time to perceive changes in protection,"Total Coastal Protection-Sim1"\
		)
	~	Inches
	~		|

"Undeveloped Coastal Land-Sim1"= INTEG (
	"Reclamation-Sim1"-"Development-Sim1",
		initial undeveloped land frac*total available land)
	~	acres
	~	Undeveloped land.
	|

"Effect of Storm Surge on Damage-Sim1"= WITH LOOKUP (
	Max(0, "Inches Above Protection Margin of Safety-Sim1"/Height of Storm Surge that Produces Max Damage\
		),
		([(0,0)-(5,2)],(0,0),(0.256619,0.428571),(0.498982,0.757143),(0.755601,0.938095),(1\
		,1),(5,1.5) ))
	~	Dmnl
	~		|

Effect of Storm Surge on Damage= WITH LOOKUP (
	Max(0, Inches Above Protection Margin of Safety/Height of Storm Surge that Produces Max Damage\
		),
		([(0,0)-(5,2)],(0,0),(0.256619,0.428571),(0.498982,0.757143),(0.755601,0.938095),(1\
		,1),(5,1.5) ))
	~	Dmnl
	~	Nonlinear effect that captures the amount of damage generated by how many \
		inches above the total protection the surge from this storm is.
	|

"percent undeveloped-Sim1"=
	"Undeveloped Coastal Land-Sim1"/total available land
	~	Dmnl
	~	The fraction of all land that remains available for development.
	|

"Developed Coastal Land-Sim1"= INTEG (
	"Development-Sim1"-"Reclamation-Sim1",
		total available land-(total available land*initial undeveloped land frac))
	~	acres
	~	developed land
	|

"effective development fraction-Sim1"=
	normal development Rate*(1+"Impact of Safety on Development-Sim1")
	~	1/Year
	~		|

Cumulative Damages Avoided=
	"Cumulative Storm Damage (Net Present Value)-Sim1"-"Cumulative Storm Damage (Net Present Value)"
	~	Dollars
	~	Captures, in net present dollars, how much damage was avoided as a results \
		of the natural and built protection availabe give the different levels of \
		storm surge over time.
	|

Height of Storm Surge that Produces Max Damage=
	20
	~	Inches
	~	Maximum height that leads maximum amoung of damage.  Damage to buildings \
		to the point where they are a total loss.
	|

"Current Storm Damage-Sim1"=
	"Developed Coastal Land-Sim1"*"Current Storm Damage per Acre-Sim1"
	~	Dollars
	~		|

"Reclamation-Sim1"=
	0
	~	acres/Year
	~		|

"Max Development-Sim1"=
	20000
	~	acres
	~		|

"base flood-Sim1"=
	Initial Storm Volatility+Initial Mean Max Surge
	~	Inches
	~		|

"Perceived Safety for Development-Sim1"=
	"Perceived Protection-Sim1"/"base flood-Sim1"
	~	Dmnl
	~	Additional protection perceived from new project. Any number greater than \
		one suggests the community perceives safety from the coastal protection
	|

"Development Saturation Multiplier-Sim1"=
	("Max Development-Sim1"/"Developed Coastal Land-Sim1")
	~	Dmnl
	~		|

"Development-Sim1"=
	"Undeveloped Coastal Land-Sim1"*"Development Saturation Multiplier-Sim1"*("effective development fraction-Sim1"\
		)
	~	acres/Year
	~	Development that is occurring.
	|

"Total Coastal Protection-Sim1"=
	"Natural Environmentall Protecion-Sim1"+"Initial Built Protection-Sim1"
	~	Inches
	~		|

"Net Present Value of Current Storm Damage-Sim1"=
	Present Value*"Current Storm Damage-Sim1"*(1/TIME STEP)
	~	Dollars/Year
	~		|

"Cumulative Storm Damage (Net Present Value)-Sim1"= INTEG (
	"Net Present Value of Current Storm Damage-Sim1",
		0)
	~	Dollars
	~		|

"Impact of Safety on Development-Sim1"= WITH LOOKUP (
	"Perceived Safety for Development-Sim1",
		([(0.5,0)-(1.5,0.4)],(0,0),(1,0),(1.05,0),(1.07466,0.0140351),(1.1,0.1),(1.125,0.15\
		),(1.15611,0.181053),(1.2,0.2),(1.88688,0.2),(2,0.2) ))
	~	Dmnl
	~		|

"Impact of Undeveloped Land on Natural Protection-Sim1"= WITH LOOKUP (
	"percent undeveloped-Sim1",
		([(0,0)-(1,1)],(0,0.252632),(0.0859729,0.249123),(0.138009,0.280702),(0.162896,0.336842\
		),(0.253394,0.750877),(0.307692,0.894737),(0.361991,0.957895),(0.400452,0.985965),(\
		0.504525,0.996491),(0.75,1),(1,1) ))
	~	Dmnl
	~	The effect of developing undeveloping land on the natural protection you \
		get from the ability of undeveloped land to protect agains storm surge.
	|

"Inches Above Protection Margin of Safety-Sim1"=
	Total Storm Surge-"Total Coastal Protection-Sim1"
	~	Inches
	~		|

"Initial Built Protection-Sim1"=
	0
	~	Inches
	~		|

effective tax rate=
	percent of maximum tax rate*Max tax rate for protection
	~	1/Year
	~	The user defined tax rate that is determined to be politically feasible.
	|

Max tax rate for protection=
	0.002
	~	1/Year
	~	Max value represents the maximum tax rate before taxpayers revolt
	|

Annual local cost of reclamation=
	total reclamation cost*(1-Federal fraction of recovery)
	~	Dollars/Year
	~	Local costs of reclamation to the community.  Cost after federal subsidies \
		that are covered by the local community.
	|

Reclamation=
	if then else(Developed Coastal Land<=0,0,(Developed Coastal Land/min time to relocate entire community\
		)*buyout relocation policy switch*landowner willingness for buyout)
	~	acres/Year
	~	This structure allows for the purchase of developed land so taht it can be \
		returned to its natural state and act as a barrier for storms.  Tuypically \
		hapens after a storm and property is damaged.  The if then else structure \
		is a first order control.
	|

total reclamation cost=
	land value per acre*Reclamation
	~	Dollars/Year
	~	The dollar value for land purchased through reclamation.
	|

Current Costs Adjusted for Scope Change=
	Total Current Costs*Scope Adjustment Cost Multiplier
	~	Dollars/Year
	~	Costs with all adjustments for scope.  Possible to have a user selected \
		economies of scale or perhaps small projects would have an adjustment to \
		capture the loss of economies of scale.
	|

landowner willingness for buyout= WITH LOOKUP (
	(percent damaged/damage threshold),
		([(0,0)-(2,1)],(0,0),(0.497738,0),(0.723982,0.0526316),(0.873303,0.231579),(1,0.5),\
		(1.16742,0.750877),(1.36652,0.901754),(1.67421,0.996491),(2,1),(100,1) ))
	~	Dmnl
	~	The higher the damage the more willing the owner is to be bought out.
	|

automated taxes=
	0
	~	Dmnl
	~	User defined tax rate that would be automatic.
	|

desired annual taxes=
	desired tax rate*total land value
	~	Dollars/Year
	~	The tax rate necessary to cover a localities costs.
	|

desired tax rate=
	Net Present Value of Current Adjusted Cost/total land value
	~	1/Year
	~	The tax rate required to cover local community costs.
	|

Total Net Benefit=
	Cumulative Benefits and Damages Avoided-Cumulative Costs and Damages
	~	Dollars
	~	Total net benefit.  This is an outcome variable used by model users to \
		compare different policies and scenarios.
	~	:SUPPLEMENTARY 
	|

Random Seed for Tracking=
	10
	~	Dmnl
	~	User selected seed value for random effects of storm track.  The same seed \
		will generate an identical storm track.
	|

Effect of Storm Track on Surge at Point Claire=
	RANDOM UNIFORM( 0 , 5 , Random Seed for Tracking)/5
	~	Dmnl
	~	Captures the probability of a strom landing in just the right location in \
		order to generate a maximum surge.  Katrina and New Orleans is an example \
		of this.
	|

Total Storm Surge=
	(Sea Level Rise+Mean Max Storm Surge+Storm Volatility)*Effect of Storm Track on Surge at Point Claire
	~	Inches
	~	The total storm surge from storms and the effects of global warming.
	|

Cumulative Benefits and Damages Avoided=
	Cumulative Damages Avoided+"Cumulative Revenue Benefits From Taxes (Net Present Value)"
	~	Dollars
	~	The sum of avoided damages and revenus from taxes.
	|

Benefit Cost Ratio=
	ZIDZ("Cumulative Revenue Benefits From Taxes (Net Present Value)",Cumulative Costs and Damages\
		)
	~	Dmnl
	~		~	:SUPPLEMENTARY 
	|

Cumulative Costs and Damages=
	"Cumulative Costs (Net Present Value)"+"Cumulative Storm Damage (Net Present Value)"
	~	Dollars
	~	The sum of storm damage costs and costs from other sources such as taxes.
	|

"Cumulative Revenue Benefits From Taxes (Net Present Value)"= INTEG (
	Net Present Value of Current tax revenue,
		0)
	~	Dollars
	~	Cumulative tax value of Net Present Value of the current tax revenue.  \
		Captures the total over time costs to property owners.
	|

damage threshold=
	0.25
	~	Dmnl
	~		|

Net Present Value of Current Adjusted Cost=
	Present Value*(Current Costs Adjusted for Scope Change+annual cost to homeowner+Annual local cost of reclamation\
		)
	~	Dollars/Year
	~	Calculations for determining the Net Present Value of expenditures.
	|

threshold for disaster declaration=
	0.25
	~	Dmnl
	~		|

Federal fraction of recovery = WITH LOOKUP (
	percent damaged/threshold for disaster declaration,
		([(0.5,0)-(2,1)],(0,0),(0.800905,0),(0.864253,0.0175439),(0.895928,0.0596491),(1,0.5\
		),(1.06335,0.680702),(1.1086,0.782456),(1.19231,0.898246),(1.30995,0.975439),(1.5,1\
		),(20,1) ))
	~	Dmnl
	~		|

Current Storm Damage=
	Developed Coastal Land*Current Storm Damage per Acre*building codes effect on damage
	~	Dollars
	~	The storm damage generated by one storm taking into consideration the \
		mitigating factors of building codes that are in place.
	|

building code policy=
	0
	~	Dmnl [0,1,0.1]
	~	1=all properties comply with building codes; 0=no building code policy
	|

annual cost per building code upgrade=
	0.0005
	~	1/Year
	~	The fraction of dollars per year that changes to the building code and the \
		land value will cost the owner of the property.
	|

annual cost to homeowner=
	annual cost per building code upgrade*building code in effect*total land value
	~	Dollars/Year
	~	Cost of code enforcement policies on property owners.
	|

building code in effect=
	STEP(building code policy,year of buliding code policy)
	~	Dmnl
	~	Policy that allows the user to change or improve building codes to reduce \
		future damage of land and property from coastal storms.
	|

building codes effect on damage= WITH LOOKUP (
	smooth(building code in effect,time to implement building code),
		([(0,0.5)-(1,1)],(0,1),(0.137615,0.995614),(0.253823,0.982456),(0.348624,0.951754),\
		(0.752294,0.561404),(0.868502,0.508772),(1,0.5) ))
	~	Dmnl
	~	Stronger building codes enable building to with stand higher storm surges.
	|

year of buliding code policy=
	2020
	~	Year [2012,2052,1]
	~	Allows the user to change the year in which the building code policy goes \
		into effect.
	|

time to implement building code=
	10
	~	Years
	~	Average number of years to implement the building code once it is put into \
		place.
	|

Annual Maintenance Percentage=
	0.02
	~	1/Year
	~	The annual cost per inch of protection.
	|

Sea Level Rise by 2052=
	0
	~	Inches/Year
	~	User identified sea level rise.  Allows for different values by model \
		users to test different possible futures.
	|

Percent Increase in Volatity Per Degree Rise=
	0.05
	~	Dmnl/degrees/Year
	~	Percent increase in volatity per degree rise in temperature.
	|

Total Current Costs=
	Current Planning Costs+Current Siting Costs+Current Construction Costs+Current Maintenance Costs
	~	Dollars/Year
	~	Sum of all costs for planning, siting, construction and current \
		maintenance of built protection.
	|

Percent Increase in Surge Per Degree Rise=
	0.05
	~	1/degrees/Year
	~	Captures the concept that global warming will increase the size of storms \
		and storm surge.
	|

Cost remaining after taxes=
	Current Costs Adjusted for Scope Change-annual taxes
	~	Dollars/Year
	~		~	:SUPPLEMENTARY 
	|

Sea Level Rise=
	RAMP( Sea Level Rise by 2052/40 , 2012 , 2052 )
	~	Inches
	~	The ramp function allows for a linear rise in sea level over the 40 year \
		simulation period of the model.
	|

Current Maintenance Costs=
	Finished Build Protection*Normal Construction Costs*Annual Maintenance Percentage
	~	Dollars/Year
	~	The cost of maintaining the built protection in place.  The built \
		protection needs to be repaired due to wear and tear.
	|

Current Storm Damage per Acre=
	Effect of Storm Surge on Damage*Maximum Damage Per Acre per storm
	~	Dollars/acres
	~	Captures the amount of damage generated the strom surge from this storm.
	|

Net Present Value of Current Storm Damage=
	Present Value*Current Storm Damage*(1/TIME STEP)
	~	Dollars/Year
	~	Storm damage from the current year in dollars converted to net present \
		value.
	|

Discount Rate=
	0.07
	~	1/Year
	~		|

Present Value=
	EXP(-(Time-INITIAL TIME)*Discount Rate)
	~	Dmnl
	~		|

total land value=
	Developed Coastal Land*land value per acre
	~	Dollars
	~	The value of developed land for tax purposes.
	|

percent undeveloped=
	Undeveloped Coastal Land/total available land
	~	Dmnl
	~	Fraction of land remaing undeveloped.
	|

Impact of Undeveloped Land on Natural Protection= WITH LOOKUP (
	percent undeveloped,
		([(0,0)-(1,1)],(0,0.252632),(0.0859729,0.249123),(0.138009,0.280702),(0.162896,0.336842\
		),(0.253394,0.750877),(0.307692,0.894737),(0.361991,0.957895),(0.400452,0.985965),(\
		0.504525,0.996491),(0.75,1),(1,1) ))
	~	Dmnl
	~	Effect that undeveloped land has on natural protection.
	|

zoning switch=
	STEP(zoning regulations,zoning policy year)
	~	Dmnl
	~	Zoning law policy.
	|

min time to relocate entire community=
	TIME STEP*1.1
	~	Years
	~		|

buyout relocation policy switch=
	STEP(1,year of buyout policy)*buyout or relocation policy
	~	Dmnl
	~	Structure that allows buyout policy to reclaim land at a particular point \
		in time.
	|

Development=
	Undeveloped Coastal Land*Development Saturation Multiplier*(effective development fraction\
		*(1-zoning switch))
	~	acres/Year
	~	Land being developed each year.
	|

effective development fraction=
	normal development Rate*(1+Impact of Safety on Development)
	~	1/Year
	~	Rate at which actual development occurs.
	|

year of buyout policy=
	2020
	~	Year [2012,2052,1]
	~	User selected time to capture the year the policy begins to go into effect.
	|

zoning policy year=
	2020
	~	Year
	~	Year in which the zoning policy goes into effect.
	|

base flood=
	Initial Mean Max Surge+Initial Storm Volatility
	~	Inches
	~	Normal amount of flooding or storm surge that can be anticipated by this \
		community.
	|

Developed Coastal Land= INTEG (
	Development-Reclamation,
		total available land-(total available land*initial undeveloped land frac))
	~	acres
	~	Land that has been developed and has some type of structrue on it or could \
		be damaged by storm surge.
	|

Perceived Protection=
	SMOOTHI(Total Coastal Protection,time to perceive changes in protection,Total Coastal Protection\
		)
	~	Inches
	~	Community perception of the protection in place from built structure and \
		undeveloped land.
	|

total available land=
	75000
	~	acres
	~	304,640=total square acres of land in Hancock MS (source: 2000 census)
	|

Undeveloped Coastal Land= INTEG (
	Reclamation-Development,
		initial undeveloped land frac*total available land)
	~	acres
	~	Land that has not been developed.
	|

time to perceive changes in protection=
	10
	~	Years
	~	Number of years for the changes in the natural and built protection to \
		become common knowledge of the community.
	|

land value per acre=
	300000
	~	Dollars/acres
	~		|

Perceived Safety for Development=
	Perceived Protection/base flood
	~	Dmnl
	~	Additional protection perceived from new project. Any number greater than \
		one suggests the community perceives safety from the coastal protection.
	|

zoning regulations=
	0
	~	Dmnl
	~	1=strict regulations; 0=no regulations; .5=reduce the effective \
		development fraction by 50%.  User defined policy.
	|

buyout or relocation policy=
	0
	~	Dmnl [0,1,0.1]
	~	0= no policy; 1=buyout/relocation policy has been turned on.  User defined.
	|

Impact of Safety on Development= WITH LOOKUP (
	Perceived Safety for Development,
		([(0.5,0)-(1.5,0.4)],(0,0),(1,0),(1.05,0),(1.07466,0.0140351),(1.1,0.1),(1.125,0.15\
		),(1.15611,0.181053),(1.2,0.2),(1.88688,0.2),(2,0.2) ))
	~	Dmnl
	~	Effect of safety on amount of normal development that the community would \
		be likely to undertake.
	|

initial undeveloped land frac=
	0.9
	~	Dmnl
	~	Initial fraction of land that is undeveloped.
	|

percent of maximum tax rate=
	0
	~	Dmnl [0,1,0.001]
	~	Value between 0 and 1. A value of 1 represents the maximum possible tax \
		rate you can charge your citizens without an uprising from tax groups in \
		your community.
	|

Initial Natural Environmental Protection=
	151
	~	Inches
	~	The amount of protection from the natural environment of undeveloped land.
	|

Natural Environment Protecion=
	Initial Natural Environmental Protection*Impact of Undeveloped Land on Natural Protection
	~	Inches
	~	The amount of natural protection against storm surge.  It is reduced as \
		land becomes developed.
	|

Built Proection Being Sited= INTEG (
	Siting Progress,
		0)
	~	Inches
	~	Preconstruction Engineering and Design (PED) study
	|

Built Protection Goal=
	STEP(Height of Protection, Project Start Time)
	~	Inches
	~	Determines the desired or goal height of built protection.
	|

Built Protection in Planning= INTEG (
	Planning Progress,
		0)
	~	Inches
	~	Includes Recon and Feasibility study time.
	|

Construction Progress=
	(Built Proection Being Sited-Finished Build Protection)/Time to Complete Construction
	~	Inches/Year
	~	Goal-gap formulation to capture the inches of built protection added per \
		year.
	|

"Cumulative Costs (Net Present Value)"= INTEG (
	Net Present Value of Current Adjusted Cost,
		0)
	~	Dollars
	~	Represents the cumulative costs of Net Present Value.  Used to determine \
		the value of the project in dollar terms.
	|

"Cumulative Storm Damage (Net Present Value)"= INTEG (
	Net Present Value of Current Storm Damage,
		0)
	~	Dollars
	~	Cumulative storm damage tracked over the years and over the numerous \
		storms that will occur.  Dollars converted into net present value.
	|

Current Construction Costs=
	Construction Progress*Normal Construction Costs
	~	Dollars/Year
	~	The cost of ongoing construction.
	|

Current Planning Costs=
	Planning Progress*Normal Planning Costs
	~	Dollars/Year
	~	The cost of planning activities.
	|

Current Siting Costs=
	Siting Progress*Normal Siting Costs
	~	Dollars/Year
	~	Calculates the costs per year of siting or determing where a built \
		proctection will be constructed.
	|

Development Saturation Multiplier=
	(Max Development/Developed Coastal Land)
	~	Dmnl
	~	Fraction of land available for development.
	|

Finished Build Protection= INTEG (
	Construction Progress,
		0)
	~	Inches
	~	The amount of protection gained from developed or built protection.
	|

Temp Rise by 2052=
	0
	~	degrees [0,5,1]
	~	User identifiec variable that captures possible futures that may take into \
		account the effects of global warming.
	|

Height of Protection=
	0
	~	Inches [0,48,24]
	~	Policy inactive=0; Turn on by setting HoP to 18 inches or above. Note to \
		policy maker: Keep in mind that additional protection will require \
		additional taxes to offset the cost of the project.
	|

Impact of Global Warming on Mean Max Surge=
	1+(RAMP( Temp Rise by 2052/40 , 2012 , 2052 )*Percent Increase in Surge Per Degree Rise\
		)
	~	Dmnl
	~	The ramp function builds in a linear rise of the max storm surge over the \
		40 year course of the simulation.
	|

Impact of Global Warming on Storm Volatility=
	1+(RAMP( Temp Rise by 2052/40 , 2012 , 2052 )*Percent Increase in Volatity Per Degree Rise\
		)
	~	Dmnl
	~	Structure to capture the effect of global warming on storm surge.  \
		Although the effects of any one storm cannot be attributed to global \
		warming, global warming science indicates that strom volatility will \
		experience unprecedented swings.
	|

Initial Built Protection=
	0
	~	Inches
	~	Built protection you are starting with.  Can be adjusted for different \
		communities.
	|

Initial Mean Max Surge=
	108
	~	Inches [60,150,1]
	~	Historical mean strom surge for this area.  Can be adjusted when the model \
		is used in different communities.
	|

Initial Storm Volatility=
	24
	~	Inches
	~	Initial volatility of a storm.  This can be varied by the model user for a \
		different community.
	|

Max Development=
	20000
	~	acres
	~	Maximum area available for development.
	|

Mean Max Storm Surge=
	Initial Mean Max Surge*Impact of Global Warming on Mean Max Surge
	~	Inches
	~	Current mean storm surge given the imact of global warming.
	|

Normal Construction Costs=
	4e+006
	~	Dollars/Inches
	~	Cost of building an inch of protection.
	|

Maximum Damage Per Acre per storm=
	100000
	~	Dollars/acres
	~	The maximum dollar amount of damage per inch of storm surge above natural \
		and built protection.
	|

normal development Rate=
	0.05
	~	1/Year
	~	The highest rate at which develop may occur in this community.  Limited by \
		contractors, building inspectors, and other capacity constraints.
	|

Normal Planning Costs=
	500000
	~	Dollars/Inches
	~	Costs for the planning process, development of reports, site visits, etc.
	|

Normal Siting Costs=
	500000
	~	Dollars/Inches
	~	Cost of acquiring land and right-of-ways for the built protection.
	|

Planning Progress=
	(Built Protection Goal-Built Protection in Planning)/Time to Plan
	~	Inches/Year
	~	Captures the change in the Built Protection in Planning.
	|

Project Start Time=
	2014
	~	Years
	~	The year in which the project start.  This is user selected.
	|

Inches Above Protection Margin of Safety=
	Total Storm Surge-Total Coastal Protection
	~	Inches
	~	Determins whether the storm surge is greater or less than the total \
		protection available.  A positive number indicates that the storm surge \
		exceeds the hight of the built protection.
	|

Random Seed=
	20
	~	Dmnl [0,100,1]
	~	User selected seed value for random effects of storm track.  The same seed \
		will generate an identical voltality.
	|

Siting Progress=
	(Built Protection in Planning-Built Proection Being Sited)/Time to complete Siting
	~	Inches/Year
	~	Captures additions to the Built Protection Being Sited.  All projects \
		require siting as to their exact physical location in order to acquire \
		right of ways, determine the protection gained from a particular threat, \
		etc.
	|

Storm Volatility=
	RANDOM NORMAL(-50, 400, 0, Initial Storm Volatility*Impact of Global Warming on Storm Volatility\
		, Random Seed)
	~	Inches
	~	Captures the idea that each strom will have a different amount of storm \
		surge that is random around a mean that may change as a result of global \
		warming and storm voltality.
	|

Time to Complete Construction=
	5
	~	Years
	~	Time to complete the built protection.
	|

Time to complete Siting=
	3
	~	Years
	~	Time to complete engineering plans for picking the most appropriate \
		location of the build protection.
	|

Time to Plan=
	2
	~	Years
	~	Time that planned protection is in the planning process.
	|

Total Coastal Protection=
	Natural Environment Protecion+Initial Built Protection+Finished Build Protection
	~	Inches
	~	Total coastal protection agains storm surge acquired from natural \
		protection and the built environment.
	|

********************************************************
	.Control
********************************************************~
		Simulation Control Parameters
	|

FINAL TIME  = 2052
	~	Year
	~	The final time for the simulation.
	|

INITIAL TIME  = 2012
	~	Year
	~	The initial time for the simulation.
	|

SAVEPER  = 
        TIME STEP 
	~	Year [0,?]
	~	The frequency with which output is stored.
	|

TIME STEP  = 0.125
	~	Year [0,?]
	~	The time step for the simulation.
	|

\\\---/// Sketch information - do not modify anything except names
V300  Do not put anything below this section - it will be ignored
*Introduction Page
$192-192-192,0,Times New Roman|12||0-0-0|0-0-0|0-0-255|-1--1--1|-1--1--1|96,96,5,0
12,1,0,2455,609,553,97,8,135,0,24,-1,0,0,0,-1--1--1,0-0-0,|36|B|0-0-0
CoastalProject SIM(V1)
12,2,0,2455,875,788,127,8,135,0,24,-1,0,0,0,-1--1--1,0-0-0,|24|B|0-0-0
A Learning Simulation for the Pointe Claire Global Warming Case Study
12,3,0,2455,1103,199,63,8,135,0,24,-1,0,0,0,-1--1--1,0-0-0,|24|B|0-0-0
Michael Deegan
12,4,0,2455,1179,271,52,8,135,0,24,-1,0,0,0,-1--1--1,0-0-0,|16|B|0-0-0
US Army Corps of Engineers
12,5,0,2455,1353,279,65,8,135,0,24,-1,0,0,0,-1--1--1,0-0-0,|24|B|0-0-0
Rod MacDonald
12,6,0,2455,1439,517,55,8,135,0,24,-1,0,0,0,-1--1--1,0-0-0,|16|B|0-0-0
Initiative for System Dynamics in the Public Sector
12,7,0,2455,1599,464,64,8,135,0,24,-1,0,0,0,-1--1--1,0-0-0,|24|B|0-0-0
David Andersen and Minyoung Ku
12,8,0,2455,1685,617,116,8,135,0,24,-1,0,0,0,-1--1--1,0-0-0,|16|B|0-0-0
Public Administration and Policy Department College of Public Affairs and Policy Univerity at Albany--State University of New York
12,9,0,2465,1977,161,87,3,135,0,29,-1,0,2,0,64-160-98,64-160-98,|14|B|0-0-0
Double Click to go to Interface View
\\\---/// Sketch information - do not modify anything except names
V300  Do not put anything below this section - it will be ignored
*Interface View
$192-192-192,0,Times New Roman|24|B|0-0-0|0-0-0|0-0-255|-1--1--1|-1--1--1|96,96,5,0
10,1,buyout or relocation policy,1527,905,223,113,8,131,0,31,-1,6,0,0,160-160-160,160-160-160,|24|B|0-128-0
10,2,year of buyout policy,2027,907,223,113,3,131,0,7,-1,6,0,0,160-160-160,160-160-160,|24|B|0-128-0
10,3,building code policy,1527,644,223,113,8,131,0,31,-1,6,0,0,160-160-160,160-160-160,|24|B|0-128-0
10,4,year of buliding code policy,2024,640,223,113,8,131,0,7,-1,6,0,0,160-160-160,160-160-160,|24|B|0-128-0
10,5,Height of Protection,1527,388,223,113,8,131,0,30,-1,0,0,0,-1--1--1,160-160-160,|24|B|0-128-0
10,6,percent of maximum tax rate,2028,385,223,113,8,131,0,6,-1,6,0,0,-1--1--1,160-160-160,|24|B|0-128-0
12,7,0,1804,181,649,129,8,135,0,26,-1,0,0,0,-1--1--1,0-0-0,|36|B|128-0-64
Policies You Can Change
12,8,0,1779,1691,592,113,8,135,0,26,-1,0,0,0,-1--1--1,0-0-0,|36|B|128-0-64
Global Warming Scenario
10,9,Temp Rise by 2052,1761,1973,548,55,8,131,0,31,-1,6,0,0,160-160-160,160-160-160,|24|B|0-128-0
12,10,0,3901,181,1367,129,8,135,0,26,-1,0,0,0,-1--1--1,0-0-0,|36|B|128-0-64
Output
10,11,"Cumulative Costs (Net Present Value)",3571,1951,332,197,8,130,0,31,-1,0,0,0,0-0-255,0-255-255,|24|B|0-0-255
10,12,"Cumulative Storm Damage (Net Present Value)",2896,1951,340,197,8,130,0,7,-1,0,0,0,0-0-255,0-255-255,|24||0-0-255
10,13,Cumulative Damages Avoided,4251,1952,321,187,8,130,0,7,-1,0,0,0,0-255-255,0-255-255,|24||0-0-255
12,14,853322,3941,992,1375,639,3,188,0,0,1,0,0,0
Key_Indicators_
10,15,"Cumulative Revenue Benefits From Taxes (Net Present Value)",4951,1952,372,185,8,130,0,7,-1,0,0,0,0-192-255,0-255-255,|24||0-0-255
10,16,Percent Increase in Surge Per Degree Rise,1772,2096,545,59,8,131,0,6,-1,0,0,0,-1--1--1,160-160-160,|24||0-128-0
10,17,Percent Increase in Volatity Per Degree Rise,1765,2235,543,69,8,131,0,6,-1,0,0,0,-1--1--1,160-160-160,|24||0-128-0
10,18,Random Seed,1752,2363,540,43,8,131,0,6,-1,0,0,0,-1--1--1,160-160-160,|24||0-128-0
10,19,zoning policy year,2024,1169,223,113,8,131,0,6,-1,0,0,0,-1--1--1,160-160-160,|24||0-128-0
10,20,zoning regulations,1527,1169,223,113,8,131,0,6,-1,0,0,0,-1--1--1,160-160-160,|24||0-128-0
10,21,Discount Rate,1527,1436,223,113,8,131,0,6,-1,0,0,0,-1--1--1,160-160-160,|24||0-128-0
10,22,Cumulative Benefits and Damages Avoided,2896,2363,340,197,8,130,0,7,-1,0,0,0,0-0-255,0-255-255,|24||0-0-255
10,23,Cumulative Costs and Damages,3571,2363,332,197,8,130,0,7,-1,0,0,0,0-0-255,0-255-255,|24||0-0-255
12,24,4196184,1715,2505,191,48,3,124,0,0,0,0,0,0
Random Seed,0,100,1
10,25,desired tax rate,4261,2363,332,197,8,130,0,7,-1,0,0,0,128-128-128,255-255-0,|24||128-128-128
10,26,automated taxes,2419,352,139,64,8,3,0,6,-1,0,0,0,-1--1--1,160-160-160,|24||0-128-0
12,27,1049840,3949,2889,1375,288,3,188,0,0,2,0,0,0
Total Net Benefit,Graph
10,28,Sea Level Rise by 2052,1753,1820,516,64,8,130,0,7,-1,0,0,0,128-128-128,160-160-160,|24||0-128-0
\\\---/// Sketch information - do not modify anything except names
V300  Do not put anything below this section - it will be ignored
*Pointe Claire
$192-192-192,0,Times New Roman|12||0-0-0|0-0-0|0-0-255|-1--1--1|-1--1--1|96,96,75,0
10,1,Built Protection in Planning,-63,433,56,41,3,131,0,0,0,0,0,0
10,2,Built Proection Being Sited,159,163,100,48,3,131,0,0,0,0,0,0
10,3,Finished Build Protection,675,157,83,45,3,131,0,0,0,0,0,0
10,4,Developed Coastal Land,1468,1219,84,45,3,131,0,0,0,0,0,0
10,5,Undeveloped Coastal Land,1131,1217,75,37,3,131,0,0,0,0,0,0
12,6,48,-269,421,13,11,0,3,0,0,-1,0,0,0
1,7,9,1,4,0,0,22,0,0,0,-1--1--1,,1|(-156,427)|
1,8,9,6,100,0,0,22,0,0,0,-1--1--1,,1|(-232,427)|
11,9,48,-200,427,8,11,34,3,0,0,1,0,0,0
10,10,Planning Progress,-200,452,75,15,40,131,0,0,-1,0,0,0
10,11,Built Protection Goal,-217,344,65,25,8,131,0,0,0,0,0,0
10,12,Time to Plan,-232,531,53,15,8,131,0,4,0,0,0,0,-1--1--1,255-255-0,|12||0-0-0
10,13,Time to complete Siting,-71,67,75,25,8,131,0,4,0,0,0,0,-1--1--1,255-255-0,|12||0-0-0
10,14,Time to Complete Construction,431,87,77,25,8,131,0,4,0,0,0,0,-1--1--1,255-255-0,|12||0-128-0
10,15,Height of Protection,-173,249,57,25,8,131,0,20,0,0,0,0,-1--1--1,0-0-255,|14|B|0-0-0
10,16,Project Start Time,-280,203,37,35,8,131,0,20,0,0,0,0,-1--1--1,0-0-255,|14|B|0-0-0
1,17,15,11,0,0,0,0,0,64,0,-1--1--1,,1|(-192,288)|
1,18,16,11,0,0,0,0,0,64,0,-1--1--1,,1|(-252,269)|
1,19,1,10,1,0,0,0,1,64,0,192-192-192,|12||0-0-0,1|(-111,479)|
1,20,11,9,1,0,0,0,0,64,0,-1--1--1,,1|(-209,372)|
1,21,12,10,1,0,0,0,1,64,0,192-192-192,|12||0-0-0,1|(-231,499)|
1,22,24,5,4,0,0,22,0,0,0,-1--1--1,,1|(1131,1331)|
1,23,24,4,100,0,0,22,0,0,0,-1--1--1,,1|(1468,1331)|
11,24,2300,1297,1331,8,11,34,3,0,0,1,0,0,0
10,25,Reclamation,1297,1356,52,15,40,131,0,0,-1,0,0,0
1,26,28,4,4,0,0,22,0,0,0,-1--1--1,,1|(1340,1213)|
1,27,28,5,100,0,0,22,0,0,0,-1--1--1,,1|(1243,1213)|
11,28,1164,1288,1213,8,11,34,3,0,0,1,0,0,0
10,29,Development,1288,1239,56,15,40,131,0,0,-1,0,0,0
10,30,Current Planning Costs,-48,577,71,25,8,131,0,0,0,0,0,0
10,31,Current Siting Costs,52,363,59,25,8,131,0,0,0,0,0,0
10,32,Current Construction Costs,221,368,81,25,8,131,0,0,0,0,0,0
10,33,Normal Planning Costs,-115,679,71,25,8,131,0,0,0,0,0,0
10,34,Normal Siting Costs,164,256,59,25,8,131,0,0,0,0,0,0
10,35,Total Current Costs,189,544,57,25,8,131,0,0,0,0,0,0
10,36,Current Costs Adjusted for Scope Change,161,649,101,25,8,131,0,0,0,0,0,0
10,37,Scope Adjustment Cost Multiplier,-185,728,79,25,8,131,1,3,0,0,0,0,255-0-0,0-0-0,|12||255-0-0
1,38,11,37,1,1,0,0,0,64,0,-1--1--1,,1|(-273,488)|
1,39,37,36,1,1,0,0,0,64,0,-1--1--1,,1|(-17,672)|
1,40,10,30,1,0,0,15,1,64,0,255-0-0,|12||0-0-0,1|(-167,528)|
1,41,31,35,1,0,0,15,1,64,0,255-0-0,|12||0-0-0,1|(119,431)|
1,42,32,35,1,0,0,15,1,64,0,255-0-0,|12||0-0-0,1|(208,461)|
1,43,30,35,1,0,0,15,1,64,0,255-0-0,|12||0-0-0,1|(100,552)|
1,44,33,30,0,0,0,0,1,64,0,192-192-192,|12||0-0-0,1|(-88,635)|
1,45,34,31,0,0,0,0,1,64,0,192-192-192,|12||0-0-0,1|(115,303)|
1,46,35,36,0,0,0,15,1,64,0,255-0-0,|12||0-0-0,1|(179,581)|
10,47,"Cumulative Costs (Net Present Value)",239,775,107,47,3,131,0,2,0,0,0,0,-1--1--1,0-0-0,|12||255-0-0
12,48,48,-35,776,13,11,0,3,0,0,-1,0,0,0
1,49,51,47,4,0,0,22,0,0,0,-1--1--1,,1|(89,779)|
1,50,51,48,100,0,0,22,0,0,0,-1--1--1,,1|(4,779)|
11,51,48,39,779,8,11,34,3,0,0,1,0,0,0
10,52,Net Present Value of Current Adjusted Cost,39,815,97,25,40,131,0,2,-1,0,0,0,-1--1--1,0-0-0,|12||255-0-0
1,53,36,51,1,0,0,15,1,64,0,255-0-0,|12||0-0-0,1|(65,740)|
10,54,Temp Rise by 2052,1580,124,65,25,8,131,0,18,0,0,0,0,-1--1--1,0-0-0,|14|B|128-0-128
10,55,Sea Level Rise,908,355,63,15,8,131,0,0,0,0,0,0
10,56,Impact of Global Warming on Mean Max Surge,1317,200,103,37,8,131,0,2,0,0,0,0,-1--1--1,0-0-0,|12||128-0-128
10,57,Impact of Global Warming on Storm Volatility,1477,268,81,37,8,131,0,2,0,0,0,0,-1--1--1,0-0-0,|12||128-0-128
10,58,Initial Mean Max Surge,1055,171,73,25,8,131,0,0,0,0,0,0
10,59,Initial Storm Volatility,1580,341,52,25,8,131,0,0,0,0,0,0
10,60,Mean Max Storm Surge,1021,264,76,25,8,131,0,0,0,0,0,0
10,61,Storm Volatility,1240,320,65,15,8,131,0,0,0,0,0,0
10,62,Total Storm Surge,1097,407,51,29,8,131,0,0,0,0,0,0
10,63,Inches Above Protection Margin of Safety,888,500,88,37,8,131,0,0,0,0,0,0
10,64,Total Coastal Protection,708,636,57,25,8,131,0,0,0,0,0,0
10,65,Initial Built Protection,740,465,45,25,8,131,0,0,0,0,0,0
10,66,Natural Environment Protecion,613,812,68,39,8,131,0,0,0,0,0,0
10,67,Current Storm Damage per Acre,1431,664,76,25,8,131,0,0,0,0,0,0
10,68,Impact of Undeveloped Land on Natural Protection,583,1031,116,25,8,131,0,0,0,0,0,0
1,69,54,56,0,0,0,0,1,64,0,128-0-128,|12||0-0-0,1|(1476,153)|
1,70,54,57,1,0,0,0,1,64,0,128-0-128,|12||0-0-0,1|(1559,184)|
1,71,57,61,1,0,0,0,1,64,0,128-0-128,|12||0-0-0,1|(1375,285)|
1,72,56,60,0,0,0,0,1,64,0,128-0-128,|12||0-0-0,1|(1164,232)|
1,73,55,62,0,0,0,15,1,64,0,128-0-128,|12||0-0-0,1|(989,376)|
1,74,60,62,0,0,0,15,1,64,0,128-0-128,|12||0-0-0,1|(1051,320)|
1,75,61,62,1,0,0,15,1,64,0,128-0-128,|12||0-0-0,1|(1217,340)|
1,76,59,61,0,0,0,0,1,64,0,128-0-128,|12||0-0-0,1|(1425,331)|
1,77,58,60,0,0,0,0,1,64,0,128-0-128,|12||0-0-0,1|(1041,208)|
1,78,65,64,0,0,0,0,1,64,0,192-192-192,|12||0-0-0,1|(725,541)|
1,79,66,64,1,0,0,15,1,64,0,128-64-0,|12||0-0-0,1|(616,757)|
1,80,3,64,1,0,0,15,0,64,0,-1--1--1,,1|(687,557)|
1,81,64,63,1,0,0,15,0,64,0,-1--1--1,,1|(783,549)|
1,82,62,63,1,0,0,15,1,64,0,128-0-128,|12||0-0-0,1|(1012,421)|
10,83,Perceived Safety for Development,1109,815,60,39,8,131,0,0,0,0,0,0
10,84,normal development Rate,1120,992,77,25,8,131,0,0,0,0,0,0
10,85,Impact of Safety on Development,1280,933,84,25,8,131,0,0,0,0,0,0
10,86,Development Saturation Multiplier,1419,1049,87,25,8,131,0,0,0,0,0,0
10,87,Max Development,1443,948,60,21,8,131,0,0,0,0,0,0
10,88,Initial Mean Max Surge,959,605,79,25,8,130,0,3,-1,0,0,0,128-128-128,0-0-0,|12||128-128-128
10,89,Initial Storm Volatility,1245,763,59,25,8,130,0,3,-1,0,0,0,128-128-128,0-0-0,|12||128-128-128
1,90,83,85,0,0,0,15,1,64,0,128-64-0,|12||0-0-0,1|(1191,872)|
1,91,86,28,1,0,0,0,1,64,0,192-192-192,|12||0-0-0,1|(1348,1103)|
1,92,85,167,1,0,0,15,1,64,0,128-64-0,|12||0-0-0,1|(1287,991)|
1,93,84,167,0,0,0,0,1,64,0,192-192-192,|12||0-0-0,1|(1168,1035)|
1,94,5,29,1,0,0,0,1,64,0,192-192-192,|12||0-0-0,1|(1235,1259)|
1,95,68,66,1,0,0,15,1,64,0,128-64-0,|12||0-0-0,1|(575,936)|
1,96,4,86,1,0,0,0,1,64,0,192-192-192,|12||0-0-0,1|(1488,1120)|
1,97,87,86,1,0,0,0,1,64,0,192-192-192,|12||0-0-0,1|(1468,983)|
10,98,Maximum Damage Per Acre per storm,1177,620,65,41,8,131,0,0,0,0,0,0
1,99,98,67,0,0,0,0,1,64,0,192-192-192,|12||0-0-0,1|(1289,639)|
10,100,Current Storm Damage,1543,827,61,25,8,131,0,0,0,0,0,0
10,101,"Cumulative Storm Damage (Net Present Value)",1687,1231,69,61,3,131,0,2,0,0,0,0,-1--1--1,0-0-0,|12||255-0-0
12,102,48,1697,995,13,11,0,3,0,0,-1,0,0,0
1,103,105,101,4,0,0,22,0,0,0,-1--1--1,,1|(1701,1120)|
1,104,105,102,100,0,0,22,0,0,0,-1--1--1,,1|(1701,1027)|
11,105,48,1701,1060,8,11,34,3,0,0,4,0,0,0
10,106,Net Present Value of Current Storm Damage,1765,1060,56,55,40,131,0,2,-1,0,0,0,-1--1--1,0-0-0,|12||255-0-0
1,107,67,100,0,0,0,15,0,64,0,-1--1--1,,1|(1477,732)|
1,108,100,106,1,0,0,15,1,64,0,255-0-0,|12||0-0-0,1|(1748,867)|
1,109,5,177,1,0,0,15,1,64,0,128-64-0,|12||0-0-0,1|(871,1207)|
1,110,4,100,1,0,0,14,1,64,0,255-0-0,|12||0-0-0,1|(1545,1015)|
12,111,48,-199,181,13,11,0,3,0,0,-1,0,0,0
1,112,114,2,4,0,0,22,0,0,0,-1--1--1,,1|(3,175)|
1,113,114,111,100,0,0,22,0,0,0,-1--1--1,,1|(-128,175)|
11,114,48,-61,175,8,11,34,3,0,0,1,0,0,0
10,115,Siting Progress,-61,200,63,15,40,131,0,0,-1,0,0,0
12,116,48,361,179,13,11,0,3,0,0,-1,0,0,0
1,117,119,3,4,0,0,22,0,0,0,-1--1--1,,1|(525,176)|
1,118,119,116,100,0,0,22,0,0,0,-1--1--1,,1|(408,176)|
11,119,48,451,176,8,11,34,3,0,0,1,0,0,0
10,120,Construction Progress,451,212,55,25,40,131,0,0,-1,0,0,0
1,121,1,115,1,0,0,15,0,64,0,-1--1--1,,1|(-99,311)|
1,122,13,114,0,0,0,0,1,64,0,192-192-192,|12||0-0-0,1|(-68,120)|
1,123,2,115,1,0,0,0,1,64,0,192-192-192,|12||0-0-0,1|(93,213)|
1,124,2,120,1,0,0,15,0,64,0,-1--1--1,,1|(285,205)|
1,125,3,120,1,0,0,0,1,64,0,192-192-192,|12||0-0-0,1|(596,217)|
1,126,115,31,1,0,0,15,1,64,0,255-0-0,|12||0-0-0,1|(-12,261)|
1,127,120,32,0,0,0,15,1,64,0,255-0-0,|12||0-0-0,1|(348,281)|
1,128,14,119,0,0,0,0,1,64,0,192-192-192,|12||0-0-0,1|(440,131)|
10,129,Normal Construction Costs,451,320,81,25,8,131,0,0,0,0,0,0
1,130,129,32,0,0,0,0,1,64,0,192-192-192,|12||0-0-0,1|(344,340)|
10,131,Random Seed,1449,349,60,15,8,131,0,0,0,0,0,0
1,132,131,61,0,0,0,0,1,64,0,128-0-128,|12||0-0-0,1|(1356,336)|
10,133,annual taxes,79,1227,52,15,8,131,0,0,0,0,0,0
1,134,4,179,1,0,0,15,1,64,0,0-128-0,|12||0-0-0,1|(956,1349)|
10,135,percent of maximum tax rate,-173,1155,59,32,8,131,0,21,0,0,0,0,64-160-98,0-0-255,|12|B|0-0-0
1,136,135,278,1,0,0,15,1,64,0,0-128-0,|12||0-0-0,1|(-35,1148)|
10,137,zoning regulations,951,1156,65,29,8,131,0,21,0,0,0,0,64-160-98,0-0-255,|14|B|0-0-0
1,138,137,174,1,0,0,15,0,64,0,-1--1--1,,1|(1004,1107)|
10,139,Cost remaining after taxes,-101,1113,83,83,2,131,1,20,0,0,0,0,-1--1--1,255-0-0,|14|B|0-0-0
1,140,133,139,0,1,0,15,0,64,0,-1--1--1,,1|(24,1192)|
10,141,Initial Natural Environmental Protection,459,727,60,37,8,131,0,0,-1,0,0,0
1,142,141,66,1,0,0,0,1,64,0,192-192-192,|12||0-0-0,1|(496,763)|
10,143,buyout or relocation policy,1057,1381,51,33,8,131,0,21,0,0,0,0,64-160-98,0-0-255,|14|B|0-0-0
1,144,143,171,0,0,0,15,0,64,0,-1--1--1,,1|(1139,1396)|
1,145,4,24,1,0,0,0,1,64,0,192-192-192,|12||0-0-0,1|(1361,1296)|
10,146,initial undeveloped land frac,777,1241,79,25,8,131,0,0,0,0,0,0
1,147,146,5,1,0,0,0,0,64,1,-1--1--1,,1|(908,1303)|
10,148,land value per acre,820,1533,48,25,8,131,2,0,0,0,0,0
1,149,148,179,1,2,0,0,0,64,0,-1--1--1,,1|(555,1597)|
10,150,total available land,595,1141,44,36,8,131,0,0,0,0,0,0
1,151,150,177,1,0,0,0,1,64,0,192-192-192,|12||0-0-0,1|(641,1164)|
1,152,150,5,0,0,0,0,0,64,1,-1--1--1,,1|(837,1175)|
1,153,146,5,0,0,0,0,0,64,1,-1--1--1,,1|(947,1229)|
1,154,150,4,0,0,0,0,0,64,1,-1--1--1,,1|(1001,1176)|
1,155,146,4,0,0,0,0,0,64,1,-1--1--1,,1|(1111,1231)|
10,156,time to perceive changes in protection,817,825,89,25,8,131,0,4,0,0,0,0,-1--1--1,255-255-0,|12||0-0-0
10,157,Perceived Protection,937,711,56,48,3,131,0,0,0,0,0,0
1,158,64,157,1,0,0,15,1,64,0,128-64-0,|12||0-0-0,1|(840,668)|
1,159,156,157,0,0,0,0,1,64,0,192-192-192,|12||0-0-0,1|(857,785)|
1,160,157,83,0,0,0,15,1,64,0,128-64-0,|12||0-0-0,1|(1008,752)|
10,161,base flood,1139,693,45,15,8,131,0,0,0,0,0,0
1,162,88,161,0,0,0,15,1,64,0,128-0-128,|12||0-0-0,1|(1045,648)|
1,163,89,161,0,0,0,15,1,64,0,128-0-128,|12||0-0-0,1|(1195,729)|
1,164,161,83,0,0,0,15,1,64,0,128-0-128,|12||0-0-0,1|(1131,727)|
10,165,min time to relocate entire community,1365,1476,63,39,8,131,1,0,0,0,0,0
1,166,165,25,0,1,0,0,1,64,0,192-192-192,|12||0-0-0,1|(1329,1412)|
10,167,effective development fraction,1248,1103,59,37,8,131,0,0,0,0,0,0
1,168,167,28,0,0,0,15,1,64,0,128-64-0,|12||0-0-0,1|(1267,1157)|
10,169,year of buyout policy,800,1417,68,25,8,131,0,21,0,0,0,0,64-160-98,0-0-255,|12|B|0-0-0
1,170,169,171,0,0,0,15,0,64,0,-1--1--1,,1|(1019,1420)|
10,171,buyout relocation policy switch,1272,1425,73,25,8,131,0,0,0,0,0,0
1,172,171,25,0,0,0,15,0,64,0,-1--1--1,,1|(1280,1399)|
10,173,zoning policy year,887,1021,59,32,8,131,0,21,0,0,0,0,64-160-98,0-0-255,|12|B|0-0-0
10,174,zoning switch,1071,1081,56,15,8,131,0,0,0,0,0,0
1,175,173,174,1,0,0,15,0,64,0,-1--1--1,,1|(1031,1043)|
1,176,174,28,0,0,0,15,0,64,0,-1--1--1,,1|(1175,1144)|
10,177,percent undeveloped,723,1136,55,25,8,131,0,0,0,0,0,0
1,178,177,68,1,0,0,15,1,64,0,128-64-0,|12||0-0-0,1|(639,1105)|
10,179,total land value,332,1188,40,32,8,131,0,0,0,0,0,0
1,180,179,133,1,0,0,15,1,64,0,0-128-0,|12||0-0-0,1|(257,1209)|
10,181,Cumulative Damages Avoided,284,1500,115,115,2,130,0,29,-1,0,0,0,128-128-128,0-128-0,|16|B|128-128-128
10,182,Time,-201,863,35,15,8,130,1,3,-1,0,0,0,128-128-128,0-0-0,|12||128-128-128
10,183,Present Value,-161,787,59,15,8,131,1,0,0,0,0,0
1,184,183,52,0,1,0,0,0,64,0,-1--1--1,,1|(-91,796)|
1,185,182,183,0,1,0,0,0,64,0,-1--1--1,,1|(-187,832)|
10,186,Present Value,1793,656,71,15,8,130,1,3,-1,0,0,0,128-128-128,0-0-0,|12||128-128-128
1,187,186,106,0,1,0,0,3,64,0,192-192-192,|12||0-0-0,1|(1781,828)|
10,188,Discount Rate,-219,827,60,15,8,131,1,0,0,0,0,0
1,189,188,183,0,1,0,0,0,64,0,-1--1--1,,1|(-199,811)|
10,190,INITIAL TIME,-197,892,80,15,8,130,1,3,-1,0,0,0,128-128-128,0-0-0,|12||128-128-128
1,191,190,183,0,1,0,0,0,64,0,-1--1--1,,1|(-184,848)|
1,192,274,106,0,1,0,0,3,64,0,192-192-192,|12||0-0-0,1|(1795,895)|
10,193,Effect of Storm Surge on Damage,1133,513,55,37,8,131,0,0,0,0,0,0
1,194,63,193,1,0,0,15,0,64,0,-1--1--1,,1|(1012,485)|
1,195,193,67,0,0,0,15,0,64,0,-1--1--1,,1|(1271,581)|
10,196,Sea Level Rise by 2052,817,263,77,25,8,131,0,0,0,0,0,0
1,197,196,55,0,0,0,0,1,64,0,128-0-128,|12||0-0-0,1|(860,307)|
10,198,Percent Increase in Surge Per Degree Rise,1363,64,97,25,8,131,0,0,-1,0,0,0
1,199,198,56,0,0,0,0,1,64,0,128-0-128,|12||0-0-0,1|(1344,116)|
10,200,Percent Increase in Volatity Per Degree Rise,1757,235,105,25,8,131,0,0,-1,0,0,0
1,201,200,57,0,0,0,0,1,64,0,128-0-128,|12||0-0-0,1|(1613,251)|
10,202,Current Maintenance Costs,413,500,81,25,8,131,0,0,0,0,0,0
1,203,3,202,1,0,0,15,1,64,0,255-0-0,|12||0-0-0,1|(571,357)|
1,204,129,202,1,0,0,0,1,64,0,192-192-192,|12||0-0-0,1|(432,428)|
10,205,Annual Maintenance Percentage,489,640,87,25,8,131,0,0,-1,0,0,0
1,206,205,202,0,0,0,0,1,64,0,192-192-192,|12||0-0-0,1|(455,577)|
1,207,202,35,1,0,0,15,1,64,0,255-0-0,|12||0-0-0,1|(267,533)|
1,208,36,139,1,1,0,0,0,64,0,-1--1--1,,1|(-44,1363)|
10,209,building code policy,1784,436,41,43,8,131,0,21,0,0,0,0,0-128-0,0-0-255,|12|B|0-0-0
10,210,time to implement building code,1553,535,47,47,8,131,0,4,0,0,0,0,-1--1--1,255-255-0,|12||0-0-0
10,211,year of buliding code policy,1683,432,53,47,8,131,0,20,0,0,0,0,-1--1--1,0-0-255,|12|B|0-0-0
10,212,building code in effect,1693,583,44,36,8,131,0,0,0,0,0,0
1,213,211,212,0,0,0,0,0,64,0,-1--1--1,,1|(1687,503)|
1,214,209,212,0,0,0,0,0,64,0,-1--1--1,,1|(1741,504)|
1,215,212,217,0,0,0,0,0,64,0,-1--1--1,,1|(1673,639)|
1,216,210,217,0,0,0,0,1,64,0,192-192-192,|12||0-0-0,1|(1595,621)|
10,217,building codes effect on damage,1645,721,67,43,3,131,0,0,0,0,0,0
1,218,217,100,0,0,0,15,0,64,0,-1--1--1,,1|(1595,772)|
10,219,annual cost to homeowner,101,991,83,83,2,131,0,21,0,0,0,0,0-0-255,255-0-0,|12|B|0-0-0
10,220,building code in effect,-153,900,73,25,8,130,0,3,-1,0,0,0,128-128-128,0-0-0,|12||128-128-128
1,221,220,219,0,0,0,12,3,64,0,192-192-192,|12||0-0-0,1|(-41,940)|
10,222,annual cost per building code upgrade,-152,844,93,25,8,131,0,0,0,0,0,0
1,223,222,219,1,0,0,0,1,64,0,192-192-192,|12||0-0-0,1|(-9,936)|
1,224,219,52,1,0,0,14,1,64,0,255-0-0,|12||0-0-0,1|(41,864)|
10,225,percent damaged,1613,1008,39,25,8,131,0,0,0,0,0,0
1,226,100,225,1,0,0,15,0,64,0,-1--1--1,,1|(1607,920)|
10,227,threshold for disaster declaration,1625,1569,52,43,8,131,1,0,0,0,0,0
10,228,Federal fraction of recovery,921,1628,63,39,8,131,1,0,0,0,0,0
1,229,227,228,1,1,0,0,1,64,0,192-192-192,|12||0-0-0,1|(1344,1668)|
1,230,225,228,1,1,0,0,1,64,0,192-192-192,|12||0-0-0,1|(1635,1272)|
10,231,Annual local cost of reclamation,293,923,83,83,2,131,0,21,0,0,0,0,255-0-0,255-0-0,|12|B|255-0-0
1,232,25,275,0,0,0,15,1,64,0,255-0-0,|12||0-0-0,1|(1079,1336)|
1,233,148,275,1,2,0,0,0,64,0,-1--1--1,,1|(833,1408)|
1,234,228,231,1,1,0,0,1,64,0,192-192-192,|12||0-0-0,1|(407,1152)|
10,235,landowner willingness for buyout,1555,1335,72,41,8,131,0,0,0,0,0,0
1,236,235,25,1,0,0,15,0,64,0,-1--1--1,,1|(1428,1372)|
10,237,damage threshold,1531,1459,45,25,8,131,1,4,0,0,0,0,-1--1--1,255-255-0,|12||0-0-0
1,238,237,235,0,1,0,0,1,64,0,192-192-192,|12||0-0-0,1|(1539,1413)|
10,239,"Cumulative Revenue Benefits From Taxes (Net Present Value)",281,1324,133,56,3,131,0,0,0,0,0,0
12,240,48,-56,1323,13,11,0,3,0,0,-1,0,0,0
1,241,243,239,4,0,0,22,0,0,0,-1--1--1,,1|(105,1320)|
1,242,243,240,100,0,0,22,0,0,0,-1--1--1,,1|(3,1320)|
11,243,48,56,1320,8,11,34,3,0,0,1,0,0,0
10,244,Net Present Value of Current tax revenue,56,1356,89,25,40,131,0,0,-1,0,0,0
1,245,133,243,0,0,0,15,1,64,0,0-128-0,|12||0-0-0,1|(69,1261)|
10,246,Present Value,80,1436,71,15,8,130,1,3,-1,0,0,0,128-128-128,0-0-0,|12||128-128-128
1,247,246,244,0,1,0,0,1,64,0,192-192-192,|12||0-0-0,1|(72,1409)|
10,248,Benefit Cost Ratio,357,1597,83,83,2,131,2,4,0,0,0,0,-1--1--1,0-0-255,|12||0-0-0
1,249,239,248,1,2,0,15,0,64,0,-1--1--1,,1|(309,1501)|
1,250,101,251,1,0,0,15,1,64,0,255-0-0,|12||0-0-0,1|(1635,1368)|
10,251,Cumulative Costs and Damages,1519,1509,83,83,2,131,0,21,0,0,0,0,255-0-0,255-0-0,|12|B|255-0-0
1,252,251,248,0,2,0,15,1,64,0,255-0-0,|12||0-0-0,1|(952,1551)|
10,253,Cumulative Benefits and Damages Avoided,577,1428,93,93,2,131,0,28,0,0,0,0,-1--1--1,0-128-0,|14|B|0-0-0
1,254,181,253,0,0,0,15,1,64,0,0-128-0,|12||0-0-0,1|(425,1464)|
1,255,239,253,1,0,0,15,1,64,0,0-128-0,|12||0-0-0,1|(465,1412)|
10,256,Effect of Storm Track on Surge at Point Claire,1301,421,68,43,8,131,0,0,0,0,0,0
1,257,256,62,0,0,0,15,1,64,0,128-0-128,|12||0-0-0,1|(1204,415)|
10,258,Random Seed for Tracking,1507,416,76,25,8,131,0,0,0,0,0,0
1,259,258,256,1,0,0,0,1,64,0,128-0-128,|12||0-0-0,1|(1384,427)|
10,260,Net Present Value of Current Adjusted Cost,-147,1009,104,25,8,130,0,3,-1,0,0,0,128-128-128,0-0-0,|12||128-128-128
10,261,desired tax rate,296,1065,48,23,8,131,0,0,0,0,0,0
1,262,260,261,1,0,0,0,1,64,0,192-192-192,|12||0-0-0,1|(68,1083)|
1,263,179,261,1,0,0,0,1,64,0,192-192-192,|12||0-0-0,1|(317,1109)|
10,264,desired annual taxes,188,1136,61,25,8,131,0,0,0,0,0,0
1,265,261,264,1,0,0,0,1,64,0,192-192-192,|12||0-0-0,1|(245,1119)|
1,266,179,264,1,0,0,0,1,64,0,192-192-192,|12||0-0-0,1|(268,1145)|
10,267,automated taxes,-144,1227,45,23,8,131,0,5,0,0,0,0,64-160-98,0-0-255,|12||0-0-0
10,268,Total Net Benefit,1076,1543,111,111,2,131,0,29,0,0,0,0,0-0-255,160-160-160,|16|B|0-0-0
1,269,253,268,1,0,0,15,1,64,0,0-128-0,|12||0-0-0,1|(669,1472)|
1,270,251,268,1,0,0,15,1,64,0,255-0-0,|12||0-0-0,1|(1371,1548)|
10,271,TIME STEP,1248,1588,67,15,8,130,1,3,-1,0,0,0,128-128-128,0-0-0,|12||128-128-128
1,272,271,165,0,1,0,0,0,64,0,-1--1--1,,1|(1285,1549)|
1,273,225,235,1,0,0,15,0,64,0,-1--1--1,,1|(1604,1147)|
10,274,TIME STEP,1813,789,67,15,8,2,1,3,-1,0,0,0,128-128-128,0-0-0,|12||128-128-128
10,275,total reclamation cost,815,1315,71,25,8,131,0,0,0,0,0,0
1,276,275,231,1,0,0,15,1,64,0,255-0-0,|12||0-0-0,1|(553,1217)|
10,277,Max tax rate for protection,-163,1073,69,25,8,131,0,0,0,0,0,0
10,278,effective tax rate,65,1132,40,24,8,131,0,0,0,0,0,0
1,279,277,278,0,0,0,15,1,64,0,0-128-0,|12||0-0-0,1|(-49,1101)|
1,280,278,133,0,0,0,15,1,64,0,0-128-0,|12||0-0-0,1|(69,1169)|
10,281,Height of Storm Surge that Produces Max Damage,1376,536,95,37,8,131,0,0,-1,0,0,0
1,282,281,193,0,0,0,15,1,64,0,128-0-128,|12||0-0-0,1|(1248,524)|
1,283,267,133,0,0,0,0,1,64,0,192-192-192,|12||0-0-0,1|(-45,1227)|
1,284,264,133,0,0,0,0,1,64,0,192-192-192,|12||0-0-0,1|(133,1180)|
10,285,total land value,1681,897,52,27,8,130,0,3,-1,0,0,0,128-128-128,0-0-0,|12||128-128-128
1,286,285,225,1,0,0,0,3,64,0,192-192-192,|12||0-0-0,1|(1685,957)|
10,287,total land value,-171,953,51,24,8,130,0,3,-1,0,0,0,128-128-128,0-0-0,|12||128-128-128
1,288,287,219,0,0,0,0,1,64,0,192-192-192,|12||0-0-0,1|(-60,968)|
1,289,231,52,1,0,0,15,1,64,0,255-0-0,|12||0-0-0,1|(145,865)|
10,290,"Cumulative Costs (Net Present Value)",1747,1363,72,45,8,130,0,3,-1,0,0,0,128-128-128,0-0-0,|12||128-128-128
1,291,290,251,0,0,0,15,1,64,0,255-0-0,|12||0-0-0,1|(1644,1428)|
10,292,normal scope,-317,669,33,23,8,131,1,0,0,0,0,0
1,293,292,37,1,1,0,0,3,64,0,192-192-192,|12||0-0-0,1|(-289,712)|
10,294,scope adjust,-311,596,31,27,8,131,1,0,0,0,0,0
1,295,294,37,1,1,0,0,3,64,0,192-192-192,|12||0-0-0,1|(-281,675)|
\\\---/// Sketch information - do not modify anything except names
V300  Do not put anything below this section - it will be ignored
*Sim1-Cumulative Damages Avoided
$192-192-192,0,Times New Roman|12||0-0-0|0-0-0|0-0-255|-1--1--1|-1--1--1|96,96,5,0
10,1,"Developed Coastal Land-Sim1",983,1140,85,68,3,131,0,0,0,0,0,0
10,2,"Undeveloped Coastal Land-Sim1",411,1135,100,75,3,131,0,0,0,0,0,0
1,3,5,2,4,0,0,22,0,0,0,-1--1--1,,1|(411,1368)|
1,4,5,1,100,0,0,22,0,0,0,-1--1--1,,1|(983,1368)|
11,5,636,756,1368,21,27,34,3,0,0,1,0,0,0
10,6,"Reclamation-Sim1",756,1409,77,15,40,3,0,0,-1,0,0,0
1,7,9,1,4,0,0,22,0,0,0,-1--1--1,,1|(823,1136)|
1,8,9,2,100,0,0,22,0,0,0,-1--1--1,,1|(608,1136)|
11,9,652,728,1136,21,27,34,3,0,0,1,0,0,0
10,10,"Development-Sim1",728,1204,53,27,40,3,0,0,-1,0,0,0
10,11,"Inches Above Protection Margin of Safety-Sim1",1123,417,105,25,8,3,0,0,0,0,0,0
10,12,"Total Coastal Protection-Sim1",501,411,71,25,8,3,0,0,0,0,0,0
10,13,"Initial Built Protection-Sim1",800,400,71,25,8,3,0,0,0,0,0,0
10,14,"Natural Environmentall Protecion-Sim1",148,537,96,25,8,3,0,0,0,0,0,0
10,15,"Current Storm Damage per Acre-Sim1",1616,869,103,25,8,3,0,0,0,0,0,0
10,16,"Impact of Undeveloped Land on Natural Protection-Sim1",159,759,100,37,8,3,0,0,0,0,0,0
1,17,13,12,0,0,0,0,0,64,0,-1--1--1,,1|(659,405)|
1,18,14,12,1,0,0,0,0,64,0,-1--1--1,,1|(428,425)|
1,19,12,11,1,0,0,0,0,64,0,-1--1--1,,1|(787,363)|
10,20,"Perceived Safety for Development-Sim1",691,713,87,25,8,3,0,0,0,0,0,0
10,21,"Impact of Safety on Development-Sim1",691,889,84,25,8,131,0,0,0,0,0,0
10,22,"Development Saturation Multiplier-Sim1",1027,975,67,37,8,3,0,0,0,0,0,0
10,23,"Max Development-Sim1",1315,887,83,25,8,3,0,0,0,0,0,0
1,24,20,21,0,0,0,0,0,64,0,-1--1--1,,1|(691,792)|
1,25,22,9,1,0,0,0,0,64,0,-1--1--1,,1|(840,1057)|
1,26,21,47,1,0,0,0,0,64,0,-1--1--1,,1|(715,959)|
1,27,2,10,1,0,0,0,0,64,0,-1--1--1,,1|(592,1193)|
1,28,16,14,1,0,0,0,0,64,0,-1--1--1,,1|(148,664)|
1,29,1,22,0,0,0,0,0,64,0,-1--1--1,,1|(1005,1051)|
1,30,23,22,0,0,0,0,0,64,0,-1--1--1,,1|(1171,931)|
10,31,"Current Storm Damage-Sim1",1604,1109,61,25,8,3,0,0,0,0,0,0
10,32,"Cumulative Storm Damage (Net Present Value)-Sim1",1304,1324,111,43,3,131,0,2,0,0,0,0,-1--1--1,0-0-0,|12||255-0-0
12,33,48,1644,1337,13,11,0,3,0,0,-1,0,0,0
1,34,36,32,4,0,0,22,0,0,0,-1--1--1,,1|(1464,1337)|
1,35,36,33,100,0,0,22,0,0,0,-1--1--1,,1|(1588,1337)|
11,36,48,1531,1337,16,17,34,131,0,0,1,0,0,0
10,37,"Net Present Value of Current Storm Damage-Sim1",1531,1392,89,37,40,3,0,2,-1,0,0,0,-1--1--1,0-0-0,|12||255-0-0
1,38,15,31,0,0,0,0,0,64,0,-1--1--1,,1|(1609,980)|
1,39,31,36,0,0,0,0,0,64,0,-1--1--1,,1|(1568,1219)|
1,40,2,49,1,0,0,0,0,64,0,-1--1--1,,1|(209,979)|
1,41,1,31,1,0,0,0,0,64,0,-1--1--1,,1|(1424,1080)|
10,42,"Perceived Protection-Sim1",559,568,75,52,3,131,0,0,0,0,0,0
1,43,12,42,1,0,0,0,0,64,0,-1--1--1,,1|(525,447)|
1,44,42,20,0,0,0,0,0,64,0,-1--1--1,,1|(629,648)|
10,45,"base flood-Sim1",965,756,53,28,8,131,0,0,0,0,0,0
1,46,45,20,0,0,0,0,0,64,0,-1--1--1,,1|(853,740)|
10,47,"effective development fraction-Sim1",711,1008,92,25,8,131,0,0,0,0,0,0
1,48,47,9,0,0,0,0,0,64,0,-1--1--1,,1|(717,1064)|
10,49,"percent undeveloped-Sim1",208,953,80,25,8,3,0,0,0,0,0,0
1,50,49,16,0,0,0,0,0,64,0,-1--1--1,,1|(187,872)|
10,51,Cumulative Damages Avoided,995,1593,97,97,2,131,0,4,-1,0,0,0,128-128-128,0-0-255,|12||128-128-128
10,52,TIME STEP,1740,1516,67,15,8,2,0,3,-1,0,0,0,128-128-128,0-0-0,|12||128-128-128
1,53,52,37,0,0,0,0,0,64,0,-1--1--1,,1|(1663,1469)|
10,54,"Effect of Storm Surge on Damage-Sim1",1483,643,92,25,8,3,0,0,0,0,0,0
1,55,11,54,0,0,0,0,0,64,0,-1--1--1,,1|(1293,525)|
1,56,54,15,0,0,0,0,0,64,0,-1--1--1,,1|(1543,748)|
10,57,Total Storm Surge,1011,185,57,25,8,2,0,3,-1,0,0,0,128-128-128,0-0-0,|12||128-128-128
1,58,57,11,0,0,0,0,0,64,0,-1--1--1,,1|(1061,293)|
10,59,initial undeveloped land frac,728,1279,79,25,8,3,0,0,-1,0,0,0
10,60,Present Value,1483,1543,71,15,8,2,0,3,-1,0,0,0,128-128-128,0-0-0,|12||128-128-128
1,61,60,37,0,0,0,0,0,64,0,-1--1--1,,1|(1499,1487)|
10,62,Initial Mean Max Surge,1163,751,73,25,8,3,0,0,-1,0,0,0
10,63,Initial Storm Volatility,1165,839,52,25,8,3,0,0,-1,0,0,0
1,64,62,45,1,0,0,0,0,64,0,-1--1--1,,1|(1036,775)|
1,65,63,45,0,0,0,0,0,64,0,-1--1--1,,1|(1073,803)|
10,66,normal development Rate,411,916,77,25,8,3,0,0,-1,0,0,0
1,67,66,47,0,0,0,0,0,64,0,-1--1--1,,1|(548,959)|
10,68,total available land,168,1183,77,15,8,3,0,0,-1,0,0,0
1,69,68,49,0,0,0,0,0,64,0,-1--1--1,,1|(184,1081)|
1,70,68,2,0,0,0,0,0,64,1,-1--1--1,,1|(267,1161)|
1,71,68,1,0,0,0,0,0,64,1,-1--1--1,,1|(561,1161)|
1,72,59,2,0,0,0,0,0,64,1,-1--1--1,,1|(600,1220)|
1,73,59,1,0,0,0,0,0,64,1,-1--1--1,,1|(827,1223)|
10,74,Initial Natural Environmental Protection,232,359,60,37,8,3,0,0,-1,0,0,0
1,75,74,14,0,0,0,0,0,64,0,-1--1--1,,1|(191,447)|
10,76,time to perceive changes in protection,1053,631,89,25,8,3,0,0,-1,0,0,0
1,77,76,42,0,0,0,0,0,64,0,-1--1--1,,1|(807,601)|
10,78,Maximum Damage Per Acre per storm,1893,713,97,25,8,3,0,0,-1,0,0,0
1,79,78,15,0,0,0,0,0,64,0,-1--1--1,,1|(1763,788)|
10,80,"Cumulative Storm Damage (Net Present Value)",597,1600,113,51,3,131,0,0,-1,0,0,0
10,81,Net Present Value of Current Storm Damage,240,1560,105,25,8,2,0,3,-1,0,0,0,128-128-128,0-0-0,|12||128-128-128
1,82,81,80,0,0,0,0,0,0,0,-1--1--1,,1|(405,1577)|
1,83,80,51,0,0,0,0,0,0,0,-1--1--1,,1|(795,1596)|
1,84,32,51,0,0,0,0,0,64,0,-1--1--1,,1|(1168,1441)|
10,85,Height of Storm Surge that Produces Max Damage,1729,497,101,37,8,2,0,3,-1,0,0,0,128-128-128,0-0-0,|12||128-128-128
1,86,85,54,0,0,0,0,0,64,0,-1--1--1,,1|(1604,572)|
\\\---/// Sketch information - do not modify anything except names
V300  Do not put anything below this section - it will be ignored
*View 5
$192-192-192,0,Times New Roman|12||0-0-0|0-0-0|0-0-255|-1--1--1|-1--1--1|96,96,75,0
10,1,Built Protection in Planning,-291,295,56,41,3,131,0,0,0,0,0,0
10,2,Built Proection Being Sited,333,284,100,48,3,131,0,0,0,0,0,0
10,3,Finished Build Protection,849,279,83,45,3,131,0,0,0,0,0,0
10,4,Developed Coastal Land,1733,1100,84,45,3,131,0,0,0,0,0,0
10,5,Undeveloped Coastal Land,1396,1099,75,37,3,131,0,0,0,0,0,0
12,6,48,-515,300,13,11,0,3,0,0,-1,0,0,0
1,7,9,1,4,0,0,22,0,0,0,-1--1--1,,1|(-397,300)|
1,8,9,6,100,0,0,22,0,0,0,-1--1--1,,1|(-483,300)|
11,9,48,-456,300,8,11,34,3,0,0,1,0,0,0
10,10,Planning Progress,-456,347,52,36,40,131,0,0,-1,0,0,0
10,11,Built Protection Goal,-540,480,52,45,8,131,0,0,0,0,0,0
10,12,Time to Plan,-487,147,64,39,8,131,0,20,0,0,0,0,-1--1--1,255-255-0,|12|B|0-0-0
10,13,Time to complete Siting,111,152,65,43,8,131,0,20,0,0,0,0,-1--1--1,255-255-0,|12|B|0-0-0
10,14,Time to Complete Construction,591,157,76,45,8,131,0,20,0,0,0,0,-1--1--1,255-255-0,|12|B|0-128-0
10,15,Height of Protection,-612,337,64,39,8,131,0,28,0,0,0,0,-1--1--1,64-160-98,|14|B|0-0-0
10,16,Project Start Time,-560,660,64,39,8,131,0,28,0,0,0,0,-1--1--1,64-160-98,|14|B|0-0-0
1,17,15,11,0,0,0,0,0,64,0,-1--1--1,,1|(-581,396)|
1,18,16,11,0,0,0,0,0,64,0,-1--1--1,,1|(-551,581)|
1,19,1,10,1,0,0,0,0,64,0,-1--1--1,,1|(-344,363)|
1,20,11,10,1,0,0,0,0,64,0,-1--1--1,,1|(-528,429)|
1,21,12,9,1,0,0,0,0,64,0,-1--1--1,,1|(-515,247)|
1,22,24,5,4,0,0,22,0,0,0,-1--1--1,,1|(1396,1212)|
1,23,24,4,100,0,0,22,0,0,0,-1--1--1,,1|(1733,1212)|
11,24,2300,1563,1212,8,11,34,3,0,0,1,0,0,0
10,25,Reclamation,1563,1247,71,24,40,131,0,0,-1,0,0,0
1,26,28,4,4,0,0,22,0,0,0,-1--1--1,,1|(1605,1095)|
1,27,28,5,100,0,0,22,0,0,0,-1--1--1,,1|(1508,1095)|
11,28,1164,1553,1095,8,11,34,3,0,0,1,0,0,0
10,29,Development,1553,1121,67,16,40,131,0,0,-1,0,0,0
10,30,Current Planning Costs,-363,451,65,32,8,131,0,0,0,0,0,0
10,31,Current Siting Costs,-36,400,56,36,8,131,0,0,0,0,0,0
10,32,Current Construction Costs,153,463,83,47,8,131,0,0,0,0,0,0
10,33,Normal Planning Costs,-272,553,53,36,8,131,0,0,0,0,0,0
10,34,Normal Siting Costs,-221,421,41,39,8,131,0,0,0,0,0,0
10,35,Total Current Costs,-87,544,64,41,8,131,0,0,0,0,0,0
10,36,Current Costs Adjusted for Scope Change,-49,873,83,47,8,131,0,0,0,0,0,0
10,37,Scope Adjustment Cost Multiplier,-308,744,83,47,8,131,0,3,0,0,0,0,255-0-0,0-0-0,|12||255-0-0
1,38,11,37,1,0,0,0,0,64,0,-1--1--1,,1|(-407,613)|
1,39,37,36,1,0,0,0,0,64,0,-1--1--1,,1|(-172,796)|
1,40,10,30,1,0,0,0,0,64,0,-1--1--1,,1|(-440,387)|
1,41,31,35,1,0,0,0,0,64,0,-1--1--1,,1|(-52,461)|
1,42,32,35,1,0,0,0,0,64,0,-1--1--1,,1|(29,511)|
1,43,30,35,1,0,0,0,0,64,0,-1--1--1,,1|(-179,524)|
1,44,33,30,0,0,0,0,0,64,0,-1--1--1,,1|(-311,507)|
1,45,34,31,0,0,0,0,0,64,0,-1--1--1,,1|(-144,412)|
1,46,35,36,0,0,0,0,0,64,0,-1--1--1,,1|(-68,696)|
10,47,"Cumulative Costs (Net Present Value)",483,744,107,47,3,131,0,2,0,0,0,0,-1--1--1,0-0-0,|12||255-0-0
12,48,48,189,737,13,11,0,3,0,0,-1,0,0,0
1,49,51,47,4,0,0,22,0,0,0,-1--1--1,,1|(329,740)|
1,50,51,48,100,0,0,22,0,0,0,-1--1--1,,1|(235,740)|
11,51,48,276,740,8,11,34,3,0,0,1,0,0,0
10,52,Net Present Value of Current Adjusted Cost,276,792,81,41,40,131,0,2,-1,0,0,0,-1--1--1,0-0-0,|12||255-0-0
1,53,36,52,1,0,0,0,0,64,0,-1--1--1,,1|(75,849)|
10,54,Temp Rise by 2052,2424,-116,83,47,8,131,0,26,0,0,0,0,-1--1--1,0-0-0,|14|B|255-0-0
10,55,Sea Level Rise,1747,11,52,29,8,131,0,0,0,0,0,0
10,56,Impact of Global Warming on Mean Max Surge,2176,-81,83,47,8,131,0,2,0,0,0,0,-1--1--1,0-0-0,|12||255-0-0
10,57,Impact of Global Warming on Storm Volatility,2281,19,83,47,8,131,0,2,0,0,0,0,-1--1--1,0-0-0,|12||255-0-0
10,58,Initial Mean Max Surge,1920,-81,83,47,8,131,0,0,0,0,0,0
10,59,Initial Storm Volatility,2247,204,83,47,8,131,0,0,0,0,0,0
10,60,Mean Max Storm Surge,1907,76,56,40,8,131,0,0,0,0,0,0
10,61,Storm Volatility,1932,199,47,36,8,131,0,0,0,0,0,0
10,62,Total Storm Surge,1712,204,51,39,8,131,0,0,0,0,0,0
10,63,Inches Above Protection Margin of Safety,1444,291,83,47,8,131,0,0,0,0,0,0
10,64,Total Coastal Protection,1163,440,60,32,8,131,0,0,0,0,0,0
10,65,Initial Built Protection,924,592,64,40,8,131,0,0,0,0,0,0
10,66,Natural Environment Protecion,1177,604,83,47,8,131,0,0,0,0,0,0
10,67,Current Storm Damage per Acre,2011,635,83,47,8,131,0,0,0,0,0,0
10,68,Impact of Undeveloped Land on Natural Protection,1085,829,83,47,8,131,0,0,0,0,0,0
1,69,54,56,0,0,0,0,0,64,0,-1--1--1,,1|(2308,-100)|
1,70,54,57,1,0,0,0,0,64,0,-1--1--1,,1|(2389,-56)|
1,71,57,61,1,0,0,0,0,64,0,-1--1--1,,1|(2127,83)|
1,72,56,60,0,0,0,0,0,64,0,-1--1--1,,1|(2037,0)|
1,73,55,62,0,0,0,0,0,64,0,-1--1--1,,1|(1732,93)|
1,74,60,62,0,0,0,0,0,64,0,-1--1--1,,1|(1813,136)|
1,75,61,62,1,0,0,0,0,64,0,-1--1--1,,1|(1891,211)|
1,76,59,61,0,0,0,0,0,64,0,-1--1--1,,1|(2080,200)|
1,77,58,60,0,0,0,0,0,64,0,-1--1--1,,1|(1913,-8)|
1,78,65,64,0,0,0,0,0,64,0,-1--1--1,,1|(1041,516)|
1,79,66,64,1,0,0,0,0,64,0,-1--1--1,,1|(1172,573)|
1,80,3,64,1,0,0,0,0,64,0,-1--1--1,,1|(1081,365)|
1,81,64,63,1,0,0,0,0,64,0,-1--1--1,,1|(1279,323)|
1,82,62,63,0,0,0,0,0,64,0,-1--1--1,,1|(1603,237)|
10,83,Perceived Safety for Development,1611,621,84,36,8,131,0,0,0,0,0,0
10,84,normal development Rate,1541,788,64,37,8,131,0,0,0,0,0,0
10,85,Impact of Safety on Development,1733,779,83,47,8,131,0,0,0,0,0,0
10,86,Development Saturation Multiplier,1759,936,83,47,8,131,0,0,0,0,0,0
10,87,Max Development,1887,852,61,27,8,131,0,0,0,0,0,0
10,88,Initial Mean Max Surge,1524,381,59,39,8,130,0,3,-1,0,0,0,128-128-128,0-0-0,|12||128-128-128
10,89,Initial Storm Volatility,1784,544,63,35,8,130,0,3,-1,0,0,0,128-128-128,0-0-0,|12||128-128-128
1,90,83,85,0,0,0,0,0,64,0,-1--1--1,,1|(1661,687)|
1,91,86,28,1,0,0,0,0,64,0,-1--1--1,,1|(1663,1021)|
1,92,85,167,1,0,0,0,0,64,0,-1--1--1,,1|(1696,855)|
1,93,84,167,0,0,0,0,0,64,0,-1--1--1,,1|(1552,841)|
1,94,5,29,1,0,0,0,0,64,0,-1--1--1,,1|(1500,1140)|
1,95,68,66,1,0,0,0,0,64,0,-1--1--1,,1|(1104,732)|
1,96,4,86,0,0,0,0,0,64,0,-1--1--1,,1|(1743,1027)|
1,97,87,86,1,0,0,0,0,64,0,-1--1--1,,1|(1865,917)|
10,98,Maximum Damage Per Acre per storm,1792,664,55,56,8,131,0,0,0,0,0,0
1,99,98,67,0,0,0,0,0,64,0,-1--1--1,,1|(1877,652)|
10,100,Current Storm Damage,2013,883,48,51,8,131,0,0,0,0,0,0
10,101,"Cumulative Storm Damage (Net Present Value)",2224,1059,69,61,3,131,0,2,0,0,0,0,-1--1--1,0-0-0,|12||255-0-0
12,102,48,2475,1029,13,11,0,3,0,0,-1,0,0,0
1,103,105,101,4,0,0,22,0,0,0,-1--1--1,,1|(2341,1031)|
1,104,105,102,100,0,0,22,0,0,0,-1--1--1,,1|(2433,1031)|
11,105,48,2397,1031,8,11,34,3,0,0,1,0,0,0
10,106,Net Present Value of Current Storm Damage,2397,1084,88,43,40,131,0,2,-1,0,0,0,-1--1--1,0-0-0,|12||255-0-0
1,107,67,100,0,0,0,0,0,64,0,-1--1--1,,1|(2011,747)|
1,108,100,105,1,0,0,0,0,64,0,-1--1--1,,1|(2247,912)|
1,109,5,178,1,0,0,0,0,64,0,-1--1--1,,1|(1317,1069)|
1,110,4,100,1,0,0,0,0,64,0,-1--1--1,,1|(1903,1007)|
12,111,48,-24,303,13,11,0,3,0,0,-1,0,0,0
1,112,114,2,4,0,0,22,0,0,0,-1--1--1,,1|(177,296)|
1,113,114,111,100,0,0,22,0,0,0,-1--1--1,,1|(47,296)|
11,114,48,113,296,8,11,34,3,0,0,1,0,0,0
10,115,Siting Progress,113,335,43,28,40,131,0,0,-1,0,0,0
12,116,48,536,300,13,11,0,3,0,0,-1,0,0,0
1,117,119,3,4,0,0,22,0,0,0,-1--1--1,,1|(700,297)|
1,118,119,116,100,0,0,22,0,0,0,-1--1--1,,1|(583,297)|
11,119,48,625,297,8,11,34,3,0,0,1,0,0,0
10,120,Construction Progress,625,335,60,27,40,131,0,0,-1,0,0,0
1,121,1,115,1,0,0,0,0,64,0,-1--1--1,,1|(-11,343)|
1,122,13,114,0,0,0,0,0,64,0,-1--1--1,,1|(111,232)|
1,123,2,115,1,0,0,0,0,64,0,-1--1--1,,1|(272,392)|
1,124,2,120,1,0,0,0,0,64,0,-1--1--1,,1|(459,361)|
1,125,3,120,1,0,0,0,0,64,0,-1--1--1,,1|(775,359)|
1,126,115,31,1,0,0,0,0,64,0,-1--1--1,,1|(63,376)|
1,127,120,32,0,0,0,0,0,64,0,-1--1--1,,1|(409,392)|
1,128,14,119,0,0,0,0,0,64,0,-1--1--1,,1|(609,236)|
10,129,Normal Construction Costs,384,476,60,33,8,131,0,0,0,0,0,0
1,130,129,32,0,0,0,0,0,64,0,-1--1--1,,1|(288,471)|
10,131,Random Seed,2205,112,43,35,8,131,0,0,0,0,0,0
1,132,131,61,0,0,0,0,0,64,0,-1--1--1,,1|(2079,151)|
10,133,annual taxes,609,1252,60,40,8,131,0,0,0,0,0,0
1,134,4,180,1,0,0,0,0,64,0,-1--1--1,,1|(1372,1232)|
10,135,percent of maximum tax rate,185,1465,83,47,8,131,0,20,0,0,0,0,-1--1--1,0-128-0,|12|B|0-0-0
1,136,135,280,1,0,0,0,0,64,0,-1--1--1,,1|(324,1368)|
10,137,zoning regulations,1264,889,64,28,8,131,0,29,0,0,0,0,0-128-0,0-128-0,|14|B|0-0-0
1,138,137,174,1,0,0,0,0,64,0,-1--1--1,,1|(1335,917)|
10,139,Cost remaining after taxes,212,1208,83,83,2,131,0,28,0,0,0,0,-1--1--1,0-0-255,|14|B|0-0-0
1,140,133,139,0,0,0,0,0,64,0,-1--1--1,,1|(429,1232)|
10,141,Initial Natural Environmental Protection,919,715,83,47,8,131,0,0,-1,0,0,0
1,142,141,66,1,0,0,0,0,64,0,-1--1--1,,1|(991,711)|
10,143,buyout or relocation policy,1200,1452,83,47,8,131,0,28,0,0,0,0,-1--1--1,0-128-0,|14|B|0-0-0
1,144,143,171,0,0,0,0,0,64,0,-1--1--1,,1|(1276,1389)|
1,145,4,24,1,0,0,0,0,64,0,-1--1--1,,1|(1627,1177)|
10,146,initial undeveloped land frac,1133,1191,83,47,8,131,0,0,0,0,0,0
1,147,146,5,1,0,0,0,0,64,1,-1--1--1,,1|(1241,1199)|
10,148,land value per acre,1203,1564,44,32,8,131,0,0,0,0,0,0
1,149,148,180,1,0,0,0,0,64,0,-1--1--1,,1|(1059,1479)|
10,150,total available land,1005,1091,43,39,8,131,0,0,0,0,0,0
1,151,150,178,0,0,0,0,0,64,0,-1--1--1,,1|(1060,1055)|
1,152,150,5,0,0,0,0,0,64,1,-1--1--1,,1|(1175,1092)|
1,153,146,5,0,0,0,0,0,64,1,-1--1--1,,1|(1259,1145)|
1,154,150,4,0,0,0,0,0,64,1,-1--1--1,,1|(1339,1093)|
1,155,146,4,0,0,0,0,0,64,1,-1--1--1,,1|(1423,1147)|
10,156,time to perceive changes in protection,1340,705,83,47,8,131,0,20,0,0,0,0,-1--1--1,255-255-0,|12|B|0-0-0
10,157,Perceived Protection,1365,497,56,48,3,131,0,0,0,0,0,0
1,158,64,157,1,0,0,0,0,64,0,-1--1--1,,1|(1277,465)|
1,159,156,157,0,0,0,0,0,64,0,-1--1--1,,1|(1351,611)|
1,160,157,83,0,0,0,0,0,64,0,-1--1--1,,1|(1471,551)|
10,161,base flood,1584,491,56,29,8,131,0,0,0,0,0,0
1,162,88,161,0,0,0,0,0,64,0,-1--1--1,,1|(1551,432)|
1,163,89,161,0,0,0,0,0,64,0,-1--1--1,,1|(1689,519)|
1,164,161,83,0,0,0,0,0,64,0,-1--1--1,,1|(1593,543)|
10,165,min time to relocate entire community,1635,1359,64,44,8,131,0,0,0,0,0,0
1,166,165,25,0,0,0,0,0,64,0,-1--1--1,,1|(1596,1300)|
10,167,effective development fraction,1571,924,83,47,8,131,0,0,0,0,0,0
1,168,167,28,0,0,0,0,0,64,0,-1--1--1,,1|(1560,1019)|
10,169,year of buyout policy,1171,1337,64,37,8,131,0,20,0,0,0,0,-1--1--1,0-128-0,|12|B|0-0-0
1,170,169,171,0,0,0,0,0,64,0,-1--1--1,,1|(1251,1328)|
10,171,buyout relocation policy switch,1368,1316,83,47,8,131,0,0,0,0,0,0
1,172,171,25,0,0,0,0,0,64,0,-1--1--1,,1|(1463,1281)|
10,173,zoning policy year,1375,837,47,36,8,131,0,20,0,0,0,0,-1--1--1,0-128-0,|12|B|0-0-0
10,174,zoning switch,1388,956,60,24,8,131,0,0,0,0,0,0
1,175,173,174,1,0,0,0,0,64,0,-1--1--1,,1|(1392,923)|
1,176,174,28,0,0,0,0,0,64,0,-1--1--1,,1|(1473,1028)|
12,177,0,2236,357,60,28,8,135,0,0,-1,0,0,0
cap surge at 150
10,178,percent undeveloped,1160,989,83,47,8,131,0,0,0,0,0,0
1,179,178,68,0,0,0,0,0,64,0,-1--1--1,,1|(1127,917)|
10,180,total land value,983,1309,49,31,8,131,0,0,0,0,0,0
1,181,180,133,1,0,0,0,0,64,0,-1--1--1,,1|(884,1275)|
10,182,Cumulative Damages Avoided,877,1737,83,83,2,130,0,7,-1,0,0,0,128-128-128,0-0-255,|12||128-128-128
10,183,Time,-828,365,48,16,8,130,1,3,-1,0,0,0,128-128-128,0-0-0,|12||128-128-128
10,184,Present Value,-573,796,67,29,8,131,1,0,0,0,0,0
1,185,184,52,0,1,0,0,0,64,0,-1--1--1,,1|(-164,793)|
1,186,183,184,0,1,0,0,0,64,0,-1--1--1,,1|(-709,565)|
10,187,Present Value,2616,1208,83,47,8,130,1,3,-1,0,0,0,128-128-128,0-0-0,|12||128-128-128
1,188,187,106,0,1,0,0,0,64,0,-1--1--1,,1|(2511,1148)|
10,189,Discount Rate,-844,412,71,29,8,131,1,0,0,0,0,0
1,190,189,184,0,1,0,0,0,64,0,-1--1--1,,1|(-713,596)|
10,191,INITIAL TIME,-897,308,45,28,8,130,1,3,-1,0,0,0,128-128-128,0-0-0,|12||128-128-128
1,192,191,184,0,1,0,0,0,64,0,-1--1--1,,1|(-740,543)|
10,193,TIME STEP,2605,1087,56,29,8,130,1,3,-1,0,0,0,128-128-128,0-0-0,|12||128-128-128
1,194,193,106,0,1,0,0,0,64,0,-1--1--1,,1|(2525,1085)|
10,195,Effect of Storm Surge on Damage,1908,437,71,43,8,131,0,0,0,0,0,0
1,196,63,195,1,0,0,0,0,64,0,-1--1--1,,1|(1685,301)|
1,197,195,67,0,0,0,0,0,64,0,-1--1--1,,1|(1952,525)|
10,198,Sea Level Rise by 2052,1709,-80,83,47,8,131,0,0,0,0,0,0
1,199,198,55,0,0,0,0,0,64,0,-1--1--1,,1|(1727,-35)|
10,200,Percent Increase in Surge Per Degree Rise,2173,-225,83,47,8,131,0,0,-1,0,0,0
1,201,200,56,0,0,0,0,0,64,0,-1--1--1,,1|(2173,-161)|
10,202,Percent Increase in Volatity Per Degree Rise,2540,52,83,47,8,131,0,0,-1,0,0,0
1,203,202,57,0,0,0,0,0,64,0,-1--1--1,,1|(2420,36)|
10,204,Current Maintenance Costs,211,607,83,47,8,131,0,0,0,0,0,0
1,205,3,204,1,0,0,0,0,64,0,-1--1--1,,1|(568,543)|
1,206,129,204,1,0,0,0,0,64,0,-1--1--1,,1|(284,559)|
10,207,Annual Maintenance Percentage,571,455,83,47,8,131,0,0,-1,0,0,0
1,208,207,204,0,0,0,0,0,64,0,-1--1--1,,1|(399,525)|
1,209,204,35,1,0,0,0,0,64,0,-1--1--1,,1|(12,572)|
1,210,36,139,1,0,0,0,0,64,0,-1--1--1,,1|(176,1172)|
10,211,building code policy,2416,876,52,31,8,131,0,5,0,0,0,0,0-128-0,0-128-0,|12||0-0-0
10,212,time to implement building code,2315,600,83,47,8,131,0,4,0,0,0,0,-1--1--1,255-255-0,|12||0-0-0
10,213,year of buliding code policy,2520,745,51,41,8,131,0,4,0,0,0,0,-1--1--1,0-128-0,|12||0-0-0
10,214,building code in effect,2356,756,63,41,8,131,0,0,0,0,0,0
1,215,213,214,0,0,0,0,0,64,0,-1--1--1,,1|(2452,748)|
1,216,211,214,0,0,0,0,0,64,0,-1--1--1,,1|(2392,829)|
1,217,214,219,0,0,0,0,0,64,0,-1--1--1,,1|(2276,759)|
1,218,212,219,0,0,0,0,0,64,0,-1--1--1,,1|(2249,677)|
10,219,building codes effect on damage,2175,765,67,43,3,131,0,0,0,0,0,0
1,220,219,100,0,0,0,0,0,64,0,-1--1--1,,1|(2096,821)|
10,221,annual cost to homeowner,395,992,83,83,2,131,0,21,0,0,0,0,0-0-255,0-0-255,|12|B|0-0-0
10,222,building code in effect,603,924,83,47,8,130,0,3,-1,0,0,0,128-128-128,0-0-0,|12||128-128-128
1,223,222,221,0,0,0,0,0,64,0,-1--1--1,,1|(505,955)|
10,224,annual cost per building code upgrade,161,971,83,47,8,131,0,0,0,0,0,0
1,225,224,221,1,0,0,0,0,64,0,-1--1--1,,1|(297,988)|
1,226,221,52,1,0,0,0,0,64,0,-1--1--1,,1|(348,880)|
10,227,percent damaged,2015,1145,59,25,8,131,0,0,0,0,0,0
1,228,100,227,1,0,0,0,0,64,0,-1--1--1,,1|(2023,1059)|
10,229,threshold for disaster declaration,2032,1460,57,39,8,131,0,0,0,0,0,0
10,230,Federal fraction of recovery,2109,1297,83,47,8,131,0,0,0,0,0,0
1,231,229,230,1,0,0,0,0,64,0,-1--1--1,,1|(2088,1383)|
1,232,227,230,1,0,0,0,0,64,0,-1--1--1,,1|(2045,1192)|
10,233,Annual local cost of reclamation,1695,1505,83,83,2,131,0,4,0,0,0,0,-1--1--1,0-0-255,|12||0-0-0
1,234,25,277,0,0,0,0,0,64,0,-1--1--1,,1|(1532,1297)|
1,235,148,277,1,0,0,0,0,64,0,-1--1--1,,1|(1385,1504)|
1,236,230,233,1,0,0,0,0,64,0,-1--1--1,,1|(1755,1519)|
10,237,landowner willingness for buyout,1888,1253,83,47,8,131,0,0,0,0,0,0
1,238,237,25,0,0,0,0,0,64,0,-1--1--1,,1|(1728,1249)|
10,239,damage threshold,1800,1371,49,25,8,131,0,4,0,0,0,0,-1--1--1,255-255-0,|12||0-0-0
1,240,239,237,0,0,0,0,0,64,0,-1--1--1,,1|(1829,1329)|
10,241,"Cumulative Revenue Benefits From Taxes (Net Present Value)",671,1577,133,56,3,131,0,0,0,0,0,0
12,242,48,335,1575,13,11,0,3,0,0,-1,0,0,0
1,243,245,241,4,0,0,22,0,0,0,-1--1--1,,1|(496,1572)|
1,244,245,242,100,0,0,22,0,0,0,-1--1--1,,1|(393,1572)|
11,245,48,447,1572,8,11,34,3,0,0,1,0,0,0
10,246,Net Present Value of Current tax revenue,447,1628,59,45,40,131,0,0,-1,0,0,0
1,247,133,245,0,0,0,0,0,64,0,-1--1--1,,1|(523,1419)|
10,248,Present Value,336,1729,51,29,8,130,0,3,-1,0,0,0,128-128-128,0-0-0,|12||128-128-128
1,249,248,246,0,0,0,0,0,64,0,-1--1--1,,1|(375,1692)|
10,250,Benefit Cost Ratio,1231,1793,83,83,2,131,1,4,0,0,0,0,-1--1--1,0-0-255,|12||0-0-0
1,251,241,250,1,1,0,0,0,64,0,-1--1--1,,1|(769,1783)|
1,252,101,253,1,0,0,0,0,64,0,-1--1--1,,1|(2088,1569)|
10,253,Cumulative Costs and Damages,1495,1791,83,83,2,131,0,4,0,0,0,0,-1--1--1,0-192-255,|12||0-0-0
1,254,253,250,0,1,0,0,0,64,0,-1--1--1,,1|(1371,1791)|
10,255,Cumulative Benefits and Damages Avoided,1065,1625,83,83,2,131,0,4,0,0,0,0,-1--1--1,0-192-255,|12||0-0-0
1,256,182,255,0,0,0,0,0,64,0,-1--1--1,,1|(963,1685)|
1,257,241,255,0,0,0,0,0,64,0,-1--1--1,,1|(884,1603)|
10,258,Effect of Storm Track on Surge at Point Claire,2011,296,87,36,8,131,0,0,0,0,0,0
1,259,258,62,0,0,0,0,0,64,0,-1--1--1,,1|(1852,247)|
10,260,Random Seed for Tracking,2267,281,83,47,8,131,0,0,0,0,0,0
1,261,260,258,1,0,0,0,0,64,0,-1--1--1,,1|(2107,305)|
10,262,Net Present Value of Current Adjusted Cost,665,1417,83,47,8,130,0,3,-1,0,0,0,128-128-128,0-0-0,|12||128-128-128
10,263,desired tax rate,864,1435,41,23,8,131,0,0,0,0,0,0
1,264,262,263,0,0,0,0,0,64,0,-1--1--1,,1|(776,1425)|
1,265,180,263,1,0,0,0,0,64,0,-1--1--1,,1|(883,1424)|
10,266,desired annual taxes,832,1313,40,32,8,131,0,0,0,0,0,0
1,267,263,266,0,0,0,0,0,64,0,-1--1--1,,1|(851,1387)|
1,268,180,266,1,0,0,0,0,64,0,-1--1--1,,1|(925,1305)|
10,269,automated taxes,784,1103,83,47,8,131,0,4,0,0,0,0,-1--1--1,0-128-0,|12||0-0-0
10,270,Total Net Benefit,1476,1559,83,83,2,131,0,5,0,0,0,0,0-0-255,0-0-255,|12||0-0-0
1,271,255,270,1,0,0,0,0,64,0,-1--1--1,,1|(1124,1620)|
1,272,253,270,1,0,0,0,0,64,0,-1--1--1,,1|(1479,1712)|
10,273,TIME STEP,1513,1469,49,28,8,130,1,3,-1,0,0,0,128-128-128,0-0-0,|12||128-128-128
1,274,273,165,0,1,0,0,0,64,0,-1--1--1,,1|(1557,1428)|
1,275,227,237,0,0,0,0,0,64,0,-1--1--1,,1|(1971,1181)|
10,276,TIME STEP,2416,1211,89,20,8,2,1,3,-1,0,0,0,128-128-128,0-0-0,|12||128-128-128
10,277,total reclamation cost,1489,1377,48,35,8,131,0,0,0,0,0,0
1,278,277,233,0,0,0,0,0,64,0,-1--1--1,,1|(1572,1428)|
10,279,Max tax rate for protection,115,1320,83,47,8,131,0,0,0,0,0,0
10,280,effective tax rate,345,1336,63,43,8,131,0,0,0,0,0,0
1,281,279,280,0,0,0,0,0,64,0,-1--1--1,,1|(231,1327)|
1,282,280,133,0,0,0,0,0,64,0,-1--1--1,,1|(469,1296)|
10,283,Height of Storm Surge that Produces Max Damage,2120,483,83,47,8,131,0,0,-1,0,0,0
1,284,283,195,0,0,0,0,0,64,0,-1--1--1,,1|(2016,460)|
1,285,269,133,0,0,0,0,0,64,0,-1--1--1,,1|(700,1173)|
1,286,266,133,0,0,0,0,0,64,0,-1--1--1,,1|(739,1287)|
10,287,total land value,2217,1156,75,15,8,2,0,3,-1,0,0,0,128-128-128,0-0-0,|12||128-128-128
1,288,287,227,0,0,0,0,0,64,0,-1--1--1,,1|(2116,1151)|
10,289,total land value,529,1124,49,27,8,130,0,3,-1,0,0,0,128-128-128,0-0-0,|12||128-128-128
1,290,289,221,0,0,0,0,0,64,0,-1--1--1,,1|(484,1079)|
10,291,Annual local cost of reclamation,48,691,91,25,8,2,0,3,-1,0,0,0,128-128-128,0-0-0,|12||128-128-128
1,292,291,52,0,0,0,0,0,64,0,-1--1--1,,1|(140,731)|
10,293,"Cumulative Costs (Net Present Value)",1816,1613,92,25,8,2,0,3,-1,0,0,0,128-128-128,0-0-0,|12||128-128-128
1,294,293,253,0,0,0,0,0,64,0,-1--1--1,,1|(1676,1689)|
10,295,normal scope,-308,816,69,15,8,2,0,3,-1,0,0,0,128-128-128,0-0-0,|12||128-128-128
1,296,295,37,0,0,0,0,0,64,0,-1--1--1,,1|(-308,805)|
10,297,scope adjust,-308,816,65,15,8,2,0,3,-1,0,0,0,128-128-128,0-0-0,|12||128-128-128
1,298,297,37,0,0,0,0,0,64,0,-1--1--1,,1|(-308,805)|
///---\\\
:GRAPH Key_Indicators_
:TITLE Key Indicators
:SCALE
:VAR Cumulative Costs and Damages
:LINE-WIDTH 3
:VAR Cumulative Benefits and Damages Avoided
:LINE-WIDTH 3

:GRAPH Indicators_for_Display
:TITLE Indicators_for_Display
:NO-LEGEND 5
:SCALE
:VAR Cumulative Benefits and Damages Avoided
:LINE-WIDTH 1
:VAR Cumulative Costs and Damages
:LINE-WIDTH 1

:GRAPH GRAPH
:TITLE GRAPH
:SCALE
:VAR Storm Volatility
:VAR "Storm Volatility-Sim1"
:L<%^E!@
9:48buildingcode2012
22:$,Dollar,Dollars,$s
22:Day,Days
22:Hour,Hours
22:Month,Months
22:Person,People,Persons
22:Unit,Units
22:Week,Weeks
22:Year,Years
23:0
18:Coastprotect.vsc
20:Coastprotect.lst
15:0,0,0,0,0,0
19:75,2
27:3,
34:0,
4:Time
5:Total Net Benefit
35:Date
36:YYYY-MM-DD
37:2000
38:1
39:1
40:2
41:0
42:0
24:2012
25:2052
26:2052
